# Supplementary material for: Computational assessments of diastereoselective [4+2] cycloaddition and 1,3-borotopic shift of a dearomatized tertiary boronic ester intermediate: reactivities explained through transition-state distortion energies
Source: Royal Society of Chemistry journal article supplement (doi:10.1039/c9ra03820e), 2019-01-01
Supplement: c9ra03820e1.pdf [file c9ra03820e1.pdf]

## Supplementary Information

### **Computational Assessments on Diastereoselective [4+2] Cycloaddition and 1,3-Borotopic Shift of Dearomatized Tertiary Boronic Ester Intermediate: Reactivities Explained Through Transition-State Distortion Energies**

Aqeel A. Hussein,<sup>\*a,b</sup> Faisal A. Almalki,<sup>c</sup> Alaa M. Alqahtani,<sup>c</sup> and Sergey Shityakov<sup>d</sup>

<sup>a</sup> Faculty of Dentistry, University of Al-Ameed, Karbala P.O No: 198, Iraq

<sup>b</sup> School of Chemistry, University of Southampton, Southampton, Hampshire, SO17 1BJ, United Kingdom

<sup>c</sup> Department of Pharmaceutical Chemistry, Faculty of Pharmacy, Umm Al-Qura University, Makkah 21955, Saudi Arabia

<sup>d</sup> Department of Anesthesia and Critical Care, University of Würzburg, 97080 Würzburg, Germany

\*E-mail: aahh1f19@soton.ac.uk.

## Supplementary data:

Cartesian coordinates, electronic energies and free energies of all stationary points during the reaction pathways. All provided geometries were optimized at the specified level of theory. All energies are either in gas phase or tetrahydrofuran (THF) or chloroform ( $\text{CHCl}_3$ ) at 298.15 K in Hartree.

|          |            |            |            |                                   |            |            |            |
|----------|------------|------------|------------|-----------------------------------|------------|------------|------------|
| <b>8</b> |            |            |            | N                                 | -2.3925105 | -0.6940893 | -0.3123915 |
| C        | 0.7085895  | 2.7640837  | -0.6000405 | C                                 | -3.8712595 | -0.6448963 | -0.4029805 |
| C        | 0.1346025  | 1.6322867  | -0.0047455 | O                                 | -4.4055685 | -1.1835673 | 0.6748665  |
| C        | -1.2724185 | 1.6183547  | 0.0613285  | C                                 | -5.8410325 | -1.1228233 | 0.7443925  |
| C        | -2.0527175 | 2.6695417  | -0.4361755 | H                                 | -6.2779065 | -1.6356533 | -0.1138995 |
| C        | -1.4481135 | 3.7700827  | -1.0260865 | H                                 | -6.1015305 | -1.6241763 | 1.6739535  |
| C        | -0.0563725 | 3.8116717  | -1.1033165 | H                                 | -6.1667375 | -0.0811173 | 0.7581065  |
| H        | 1.7925195  | 2.8001157  | -0.6630015 | C                                 | -1.9023625 | -2.0074243 | 0.2352365  |
| H        | -3.1386545 | 2.6209767  | -0.3608145 | H                                 | -2.2732075 | -2.1286243 | 1.2508095  |
| H        | -2.0503515 | 4.5877017  | -1.4112495 | H                                 | -2.2739105 | -2.8123383 | -0.4025245 |
| H        | 0.4318355  | 4.6712957  | -1.5559355 | H                                 | -0.8079095 | -1.9499993 | 0.2073535  |
| B        | 1.1020755  | 0.4169157  | 0.5598995  | C                                 | -1.8063305 | -0.5032483 | -1.6796745 |
| C        | 0.8335125  | 0.0758857  | 2.1505695  | H                                 | -2.1452835 | 0.4434287  | -2.0899345 |
| C        | 0.2393285  | 1.0630747  | 3.1440675  | H                                 | -0.7245615 | -0.5179423 | -1.5398245 |
| C        | 1.6977555  | 0.7201417  | 3.2050625  | H                                 | -2.1441115 | -1.3331803 | -2.3026935 |
| H        | 0.5907975  | -0.9691513 | 2.3689165  | O                                 | -4.4457585 | -0.1461913 | -1.3251965 |
| H        | -0.4018095 | 0.6980857  | 3.9450045  | $E_{\text{gas}} = -1161.90821533$ |            |            |            |
| H        | -0.0387545 | 2.0469397  | 2.7708295  | $E_{\text{THF}} = -1161.93952173$ |            |            |            |
| H        | 2.0455395  | 0.1227927  | 4.0447975  | $G_{\text{gas}} = -1161.4543273$  |            |            |            |
| H        | 2.4159185  | 1.4559387  | 2.8537865  | $G_{\text{THF}} = -1161.485634$   |            |            |            |
| O        | 2.4990635  | 0.7641977  | 0.2616205  |                                   |            |            |            |
| C        | 3.1605855  | -0.3823593 | -0.2117425 | <b>9</b>                          |            |            |            |
| C        | 2.0341385  | -1.1187033 | -1.0156355 | C                                 | 0.4302659  | 2.3386161  | -1.4111607 |
| O        | 0.8757955  | -0.8576453 | -0.2396235 | C                                 | 0.1615929  | 1.4034571  | -0.3688957 |
| C        | 3.6684125  | -1.2243463 | 0.9712605  | C                                 | -1.1769971 | 1.4465081  | 0.2248513  |
| H        | 4.2936795  | -2.0616853 | 0.6393375  | C                                 | -2.1550371 | 2.4007581  | -0.2723737 |
| H        | 2.8385195  | -1.6162043 | 1.5649145  | C                                 | -1.8441231 | 3.2384581  | -1.2872907 |
| H        | 4.2672275  | -0.5796673 | 1.6217225  | C                                 | -0.5338431 | 3.1880461  | -1.8706807 |
| C        | 4.3554015  | 0.0559597  | -1.0568525 | H                                 | 1.4111439  | 2.3054151  | -1.8748607 |
| H        | 5.1006435  | 0.5347107  | -0.4133425 | H                                 | -3.1448981 | 2.3996571  | 0.1723673  |
| H        | 4.8314075  | -0.7991103 | -1.5522325 | H                                 | -2.5760581 | 3.9394791  | -1.6741967 |
| H        | 4.0526145  | 0.7820047  | -1.8154005 | H                                 | -0.3198951 | 3.8316111  | -2.7206627 |
| C        | 2.2176605  | -2.6300293 | -1.1343295 | B                                 | 1.3636439  | 0.5599361  | 0.2049953  |
| H        | 1.3971715  | -3.0618493 | -1.7203665 | C                                 | 1.4848909  | 1.7560521  | 1.4425443  |
| H        | 3.1580405  | -2.8769633 | -1.6409575 | C                                 | 1.7294749  | 3.2444421  | 1.3639383  |
| H        | 2.2167235  | -3.1041773 | -0.1497845 | C                                 | 2.8551809  | 2.3327001  | 1.7240163  |
| C        | 1.8535435  | -0.5171873 | -2.4179845 | H                                 | 0.8741029  | 1.4396701  | 2.2906173  |
| H        | 2.7140025  | -0.7180653 | -3.0654315 | H                                 | 1.2949029  | 3.8713391  | 2.1378613  |
| H        | 0.9734935  | -0.9617273 | -2.8978885 | H                                 | 1.7466799  | 3.7080251  | 0.3792473  |
| H        | 1.7043475  | 0.5647477  | -2.3544825 | H                                 | 3.2112259  | 2.3115801  | 2.7515233  |
| C        | -1.9634995 | 0.4585647  | 0.6963225  | H                                 | 3.6151789  | 2.1485901  | 0.9721263  |
| H        | -1.3124595 | -0.0333163 | 1.4158745  | O                                 | 2.5248389  | 0.4745581  | -0.6439887 |
| H        | -2.8898135 | 0.7479607  | 1.1965055  | C                                 | 3.1392289  | -0.7843609 | -0.4051377 |

|   |            |            |            |
|---|------------|------------|------------|
| C | 1.9251349  | -1.6688359 | 0.0348103  |
| O | 1.1288619  | -0.7505619 | 0.7787333  |
| C | 4.1818349  | -0.6461749 | 0.7119993  |
| H | 4.7356549  | -1.5793439 | 0.8625943  |
| H | 3.7093089  | -0.3611979 | 1.6560883  |
| H | 4.8973919  | 0.1344471  | 0.4359463  |
| C | 3.8316579  | -1.2371669 | -1.6874167 |
| H | 4.6644609  | -0.5623479 | -1.9099727 |
| H | 4.2343469  | -2.2514199 | -1.5824387 |
| H | 3.1465739  | -1.2143479 | -2.5379857 |
| C | 2.2776199  | -2.8502539 | 0.9308603  |
| H | 1.3696889  | -3.4108719 | 1.1781193  |
| H | 2.9720689  | -3.5321799 | 0.4269933  |
| H | 2.7305959  | -2.5131849 | 1.8659123  |
| C | 1.1214519  | -2.1590449 | -1.1768407 |
| H | 1.6724349  | -2.9102109 | -1.7526877 |
| H | 0.1888849  | -2.6143019 | -0.8329227 |
| H | 0.8740429  | -1.3257969 | -1.8427287 |
| C | -1.5134731 | 0.6057571  | 1.2356913  |
| H | -0.8047391 | -0.1244339 | 1.6134163  |
| H | -2.5010441 | 0.6440191  | 1.6878163  |
| N | -3.1127181 | -1.3085189 | -0.6417427 |
| C | -4.1410141 | -0.5748559 | -0.1442127 |
| O | -4.5659031 | -1.0471019 | 1.0536953  |
| C | -5.6864211 | -0.3586919 | 1.5962693  |
| H | -6.5435031 | -0.4161949 | 0.9209783  |
| H | -5.9082391 | -0.8617729 | 2.5376083  |
| H | -5.4505191 | 0.6938371  | 1.7749293  |
| C | -2.5077641 | -2.4299189 | 0.0522873  |
| H | -1.5361341 | -2.1463349 | 0.4760963  |
| H | -3.1626541 | -2.7770449 | 0.8484043  |
| H | -2.3478111 | -3.2473919 | -0.6600007 |
| C | -2.4597501 | -0.8719269 | -1.8587127 |
| H | -1.4142511 | -0.6122379 | -1.6543757 |
| H | -2.4808451 | -1.6736889 | -2.6062697 |
| H | -2.9790951 | 0.0030161  | -2.2466857 |
| O | -4.6376351 | 0.4017421  | -0.6790977 |

$E_{\text{gas}} = -1161.88752863$

$E_{\text{THF}} = -1161.90784125$

$G_{\text{gas}} = -1161.4428396$

$G_{\text{THF}} = -1161.463152$

Imaginary frequency = -121.3927

### **N(Me)<sub>2</sub>CO<sub>2</sub>Me**

|   |            |            |            |
|---|------------|------------|------------|
| N | 0.8343591  | -0.0506971 | -0.0892616 |
| C | -0.4463519 | -0.5159971 | -0.0348856 |
| O | -0.7628829 | -1.6903401 | -0.0142006 |
| O | -1.3468329 | 0.4934689  | -0.0214016 |
| C | -2.7051889 | 0.0710389  | -0.0010976 |
| H | -2.9131339 | -0.5269901 | 0.8895364  |
| H | -3.2940409 | 0.9887509  | 0.0113544  |
| H | -2.9422459 | -0.5212731 | -0.8884616 |

|   |           |            |            |
|---|-----------|------------|------------|
| C | 1.1884661 | 1.3506869  | -0.0014246 |
| H | 1.5565331 | 1.6050809  | 1.0022154  |
| H | 1.9833741 | 1.5690719  | -0.7236696 |
| H | 0.3258481 | 1.9723939  | -0.2304226 |
| C | 1.9206941 | -1.0023101 | 0.0080034  |
| H | 2.6554961 | -0.8144231 | -0.7835916 |
| H | 2.4280591 | -0.9204111 | 0.9788824  |
| H | 1.5178471 | -2.0080501 | -0.1015756 |

$E_{\text{gas}} = -363.059514899$

$E_{\text{THF}} = -363.067371224$

$G_{\text{gas}} = -362.954054$

$G_{\text{THF}} = -362.961910$

### **10a**

|   |            |            |            |
|---|------------|------------|------------|
| C | -2.1999184 | -0.6427890 | -1.4054879 |
| C | -1.6775154 | 0.1637680  | -0.2356589 |
| C | -2.1890344 | -0.3528350 | 1.1241961  |
| C | -3.2242154 | -1.3866910 | 1.1308391  |
| C | -3.6583804 | -1.9788000 | 0.0067481  |
| C | -3.1158324 | -1.6095950 | -1.2963449 |
| H | -1.8106594 | -0.3627860 | -2.3815049 |
| H | -3.6337264 | -1.6696880 | 2.0977631  |
| H | -4.4244674 | -2.7474860 | 0.0552021  |
| H | -3.4720404 | -2.1335520 | -2.1786199 |
| C | -1.7249814 | 0.1428640  | 2.2832271  |
| H | -0.9545724 | 0.9054760  | 2.3176691  |
| H | -2.1239934 | -0.2019520 | 3.2336151  |
| B | -0.1000344 | -0.0131840 | -0.1808969 |
| O | 0.7771856  | 0.8834180  | 0.3766181  |
| O | 0.5217646  | -1.1368670 | -0.6521429 |
| C | 1.9439306  | -0.9159620 | -0.5638229 |
| C | 2.0414186  | 0.2015240  | 0.5300401  |
| C | 2.4030396  | -0.4463820 | -1.9454579 |
| H | 3.4887716  | -0.3153510 | -1.9872219 |
| H | 1.9261886  | 0.5005450  | -2.2181999 |
| H | 2.1142056  | -1.1967250 | -2.6865649 |
| C | 2.6247326  | -2.2272370 | -0.1993169 |
| H | 3.6971556  | -2.0717950 | -0.0381019 |
| H | 2.5019956  | -2.9462090 | -1.0144929 |
| H | 2.1928256  | -2.6637600 | 0.7035151  |
| C | 3.1661996  | 1.2057990  | 0.3273271  |
| H | 3.1402056  | 1.9537590  | 1.1250161  |
| H | 3.0718376  | 1.7258700  | -0.6281649 |
| H | 4.1395676  | 0.7043630  | 0.3607941  |
| C | 2.0712376  | -0.3521280 | 1.9552971  |
| H | 3.0221276  | -0.8486770 | 2.1717551  |
| H | 1.2553396  | -1.0628030 | 2.1207551  |
| H | 1.9445016  | 0.4749410  | 2.6599051  |
| C | -2.1704854 | 1.6021830  | -0.4580279 |
| C | -1.4678014 | 2.5621250  | -1.3815379 |
| H | -3.2578164 | 1.6455940  | -0.4952339 |
| H | -2.0686004 | 3.1717220  | -2.0496059 |

H -0.5073284 2.2627770 -1.7942889  
C -1.5129994 2.8325680 0.1014591  
H -2.1654774 3.6226530 0.4606831  
H -0.5843504 2.7213040 0.6482681  
E<sub>gas</sub> = -798.884925121  
E<sub>THF</sub> = -798.901886562  
E<sub>CHCl3</sub> = -798.903975979  
G<sub>gas</sub> = -798.563204  
G<sub>THF</sub> = -798.580166  
G<sub>CHCl3</sub> = -798.561710

### 10b

C 0.1331926 1.8882826 -1.5197685  
C 0.1554126 1.2427436 -0.1433295  
C 0.2903956 2.2995886 0.9617525  
C 0.8483286 3.6068046 0.6017995  
C 0.9509406 4.0165446 -0.6721045  
C 0.5096286 3.1507726 -1.7572445  
H -0.2049544 1.2651446 -2.3426105  
H 1.1381996 4.2650266 1.4177265  
H 1.3357526 5.0049876 -0.9058715  
H 0.4815816 3.5492586 -2.7678845  
C -0.0459044 2.0826426 2.2431345  
H -0.5339294 1.1750296 2.5763245  
H 0.1302756 2.8467196 2.9964775  
B -1.2403124 0.4785736 -0.0573445  
O -2.2574414 0.7775926 0.8068915  
O -1.5749344 -0.5369624 -0.9229465  
C -2.9850894 -0.7943024 -0.7730765  
C -3.2705194 -0.2368864 0.6634735  
C -3.2327234 -2.2861924 -0.9434445  
H -4.2834104 -2.5262764 -0.7471425  
H -2.6057804 -2.8757474 -0.2711345  
H -3.0013884 -2.5830014 -1.9706665  
C -3.6942404 -0.0104844 -1.8787745  
H -4.7732924 -0.1932284 -1.8742235  
H -3.2926664 -0.3255624 -2.8461555  
H -3.5198514 1.0649716 -1.7737615  
C -3.0277084 -1.2657884 1.7695855  
H -3.0522254 -0.7562624 2.7370675  
H -2.0476264 -1.7412014 1.6627055  
H -3.7955204 -2.0454174 1.7681665  
C -4.6385484 0.4067406 0.8395995  
H -5.4331344 -0.3262624 0.6614465  
H -4.7761214 1.2473756 0.1566435  
H -4.7411314 0.7813316 1.8621375  
C 1.1683126 -0.7896954 1.1002485  
H 1.0919106 -0.2361864 2.0427185  
H 0.2273616 -1.3413124 0.9624905  
C 2.3290266 -1.7927864 1.1908705  
H 2.1530476 -2.4673714 2.0379855

C 1.3691116 0.1938656 -0.0712885  
C 2.7150766 0.9229556 0.1385735  
H 2.6814836 1.5020436 1.0679815  
H 2.8778986 1.6341986 -0.6812815  
C 3.6472446 -1.0328814 1.4002125  
H 4.4810746 -1.7425664 1.4840395  
H 3.6079166 -0.4656584 2.3395315  
C 3.8786726 -0.0795434 0.2177245  
H 4.8149486 0.4717596 0.3681955  
C 3.9608196 -0.8934954 -1.0809145  
H 4.1494206 -0.2257854 -1.9318965  
H 4.7979586 -1.6028294 -1.0323395  
C 2.4008536 -2.6030524 -0.1109615  
H 1.4636436 -3.1554624 -0.2609785  
H 3.2096066 -3.3437394 -0.0544145  
C 1.4868046 -0.6315224 -1.3755345  
H 0.5447406 -1.1496724 -1.5801685  
H 1.6801346 0.0417726 -2.2187785  
C 2.6382706 -1.6450474 -1.2863195  
H 2.6794066 -2.2145454 -2.2231425  
E<sub>gas</sub> = -1071.72287714  
E<sub>THF</sub> = -1071.74122845  
G<sub>gas</sub> = -1071.243481  
G<sub>THF</sub> = -1071.261779

### 11a

N -3.6922273 0.6172429 -0.0000913  
N -3.6922243 -0.6172511 -0.0000913  
C -2.2917633 1.1187709 0.0000067  
C -2.2917573 -1.1187721 0.0000167  
O -2.0298413 2.2836369 -0.0000983  
O -2.0298293 -2.2836361 -0.0000873  
N -1.4656953 0.0000009 -0.0000443  
C -0.0272553 0.0000019 -0.0000423  
C 0.6683427 -1.2110621 -0.0000153  
C 0.6683447 1.2110649 -0.0000073  
C 2.0588397 -1.1988451 0.0000517  
H 0.1380797 -2.1523281 -0.0000293  
C 2.0588417 1.1988459 0.0000597  
H 0.1380837 2.1523319 -0.0000153  
C 2.7622307 -0.0000001 0.0000797  
H 2.5901177 -2.1453651 0.0000817  
H 2.5901217 2.1453649 0.0000957  
H 3.8475917 -0.0000011 0.0001297  
E<sub>gas</sub> = -622.491779919  
E<sub>THF</sub> = -622.508053488  
G<sub>gas</sub> = -622.399144  
G<sub>THF</sub> = -622.415417

### 11b

C -1.0794867 0.4145247 0.7247103

|   |            |            |            |
|---|------------|------------|------------|
| C | 0.0922933  | 0.1434067  | 0.6241283  |
| C | 1.4897133  | -0.2520633 | 0.5432953  |
| C | -2.4798967 | 0.7946787  | 0.8966623  |
| O | 1.9179983  | -1.2787463 | 1.0087683  |
| O | -3.3613507 | 0.2307797  | 0.0630923  |
| O | -2.8222467 | 1.5755057  | 1.7434073  |
| O | 2.2052823  | 0.6634237  | -0.1103857 |
| C | 3.5992323  | 0.3610087  | -0.2403987 |
| H | 3.7353293  | -0.5705323 | -0.7943797 |
| H | 4.0265023  | 1.2001857  | -0.7867947 |
| H | 4.0601783  | 0.2664747  | 0.7452123  |
| C | -2.9136157 | -0.7085773 | -0.9147917 |
| H | -2.2041547 | -0.2479303 | -1.6081707 |
| H | -2.4552157 | -1.5810703 | -0.4407577 |
| H | -3.8105627 | -1.0110683 | -1.4535977 |

$E_{\text{gas}} = -533.058678752$

$E_{\text{THF}} = -533.073401014$

$G_{\text{gas}} = -532.980743$

$G_{\text{THF}} = -532.995465$

### 11c

|   |            |            |            |
|---|------------|------------|------------|
| C | 1.0105279  | 0.2187243  | 0.0074694  |
| H | 2.0670949  | 0.4487553  | 0.0149964  |
| C | -0.0409121 | 1.0331063  | 0.0089424  |
| H | -0.0823891 | 2.1136173  | 0.0180064  |
| C | 0.5044019  | -1.1849777 | -0.0075946 |
| C | -1.2734751 | 0.1920583  | -0.0051046 |
| O | -0.8764561 | -1.1315567 | -0.0146316 |
| O | -2.4194581 | 0.5222473  | -0.0085706 |
| O | 1.1106659  | -2.2119747 | -0.0135136 |

$E_{\text{gas}} = -379.283986181$

$E_{\text{THF}} = -379.298773160$

$G_{\text{gas}} = -379.256155$

$G_{\text{THF}} = -379.270942$

### 11d

|   |            |            |            |
|---|------------|------------|------------|
| C | 1.1403347  | -1.5046945 | -0.5617262 |
| C | -2.3753383 | -0.0113715 | -0.0847792 |
| O | 1.6363667  | -2.5047215 | -1.0247972 |
| O | -2.9191703 | 1.1598445  | 0.2997768  |
| O | -3.1029183 | -0.9042755 | -0.4396362 |
| O | 1.8469717  | -0.5066695 | -0.0075252 |
| C | -0.3241493 | -1.2540415 | -0.5477812 |
| H | -0.9331823 | -2.0411645 | -0.9803402 |
| C | -0.8861293 | -0.1522775 | -0.0490822 |
| H | -0.2631893 | 0.6237665  | 0.3797458  |
| C | 3.2613297  | -0.7001625 | 0.0088688  |
| H | 3.6480537  | -0.7851855 | -1.0094952 |
| H | 3.6714917  | 0.1804105  | 0.5020888  |

|   |            |            |            |
|---|------------|------------|------------|
| H | 3.5165867  | -1.6057405 | 0.5641558  |
| C | -2.1159993 | 2.2735645  | 0.6644738  |
| H | -1.5473823 | 2.0793615  | 1.5800448  |
| H | -1.4371193 | 2.5654915  | -0.1435302 |
| H | -2.8165573 | 3.0878655  | 0.8495378  |

$E_{\text{gas}} = -534.328924015$

$E_{\text{THF}} = -534.345069352$

$G_{\text{gas}} = -534.225893$

$G_{\text{THF}} = -534.242038$

### 11e

|   |            |            |            |
|---|------------|------------|------------|
| C | -0.3667179 | 0.4788656  | -0.8297616 |
| C | 1.9562761  | -0.4522854 | 0.8640244  |
| O | -0.1974889 | -0.7157184 | -0.9492076 |
| O | 2.9977691  | -0.5011844 | 0.2646064  |
| C | 0.2564951  | 1.3230066  | 0.2158314  |
| H | -0.1002249 | 2.3435056  | 0.3074504  |
| C | 1.2378211  | 0.8676176  | 0.9947214  |
| H | 1.6785871  | 1.5327976  | 1.7341004  |
| C | 0.2071451  | -1.4775534 | 2.1313064  |
| H | 0.1099941  | -2.4199994 | 2.6699204  |
| H | -0.5650059 | -1.4073274 | 1.3626454  |
| H | 0.1161891  | -0.6462604 | 2.8380724  |
| C | -1.7957879 | 0.4743146  | -2.6794056 |
| H | -2.3701369 | 1.2102936  | -3.2405316 |
| H | -2.4545769 | -0.2912734 | -2.2623046 |
| H | -1.0524229 | -0.0059084 | -3.3196406 |
| O | -1.1554629 | 1.2041226  | -1.6312866 |
| O | 1.4975491  | -1.5170134 | 1.5294584  |

$E_{\text{gas}} = -534.326627208$

$E_{\text{THF}} = -534.343213397$

$G_{\text{gas}} = -534.222878$

$G_{\text{THF}} = -534.239464$

### 11f

|   |            |            |            |
|---|------------|------------|------------|
| C | -0.9875867 | 0.2023288  | 0.4099495  |
| C | -0.6874407 | 0.3516118  | -0.9457495 |
| C | -0.0240277 | -0.2197622 | 1.3223305  |
| C | 0.5975103  | 0.0720548  | -1.3838935 |
| H | -1.4675037 | 0.6827728  | -1.6227695 |
| C | 1.2635683  | -0.4987392 | 0.8765425  |
| H | -0.3032887 | -0.3214892 | 2.3665995  |
| C | 1.5702373  | -0.3521302 | -0.4740515 |
| H | 0.8501083  | 0.1821338  | -2.4339715 |
| H | 2.0249133  | -0.8285792 | 1.5760155  |
| H | 2.5749383  | -0.5693962 | -0.8243355 |
| N | -2.2906607 | 0.4662538  | 0.9686045  |
| O | -3.1207677 | 0.8329408  | 0.1647295  |

$E_{\text{gas}} = -361.516638404$

$E_{\text{THF}} = -361.526012271$

$G_{\text{gas}} = -361.448223$

G<sub>THF</sub> = -361.457597

**12a-syn**

|   |            |            |            |
|---|------------|------------|------------|
| C | 0.0715324  | -1.3525160 | -1.2770529 |
| C | -1.1309076 | -1.6168590 | -0.4044939 |
| C | -0.7543266 | -2.4239890 | 0.8332361  |
| C | 0.6731654  | -2.7371910 | 1.0218701  |
| C | 1.5233114  | -2.8372970 | -0.0832729 |
| C | 1.2239724  | -2.0907360 | -1.2372149 |
| H | -0.0797206 | -0.6401770 | -2.0829209 |
| H | 0.9419834  | -3.2583460 | 1.9347951  |
| H | 2.4812474  | -3.3350830 | 0.0215641  |
| H | 1.9743484  | -1.9738540 | -2.0136809 |
| C | -1.6452526 | -2.8676610 | 1.7235891  |
| H | -2.7050766 | -2.6660460 | 1.6156831  |
| H | -1.3346006 | -3.4395450 | 2.5932621  |
| B | -1.7129236 | -0.1836040 | -0.0066499 |
| O | -2.4044746 | 0.0874050  | 1.1370771  |
| O | -1.6970176 | 0.8559270  | -0.8962509 |
| C | -2.5167586 | 1.9111990  | -0.3549459 |
| C | -2.6309726 | 1.5150320  | 1.1644541  |
| C | -3.8508586 | 1.8556380  | -1.1007019 |
| H | -4.5273126 | 2.6529130  | -0.7773429 |
| H | -4.3505846 | 0.8926240  | -0.9541799 |
| H | -3.6626756 | 1.9777080  | -2.1715149 |
| C | -1.8180026 | 3.2387960  | -0.6152939 |
| H | -2.3486186 | 4.0620050  | -0.1242419 |
| H | -1.7990346 | 3.4372810  | -1.6909649 |
| H | -0.7849596 | 3.2125010  | -0.2633919 |
| C | -3.9944296 | 1.7736720  | 1.7904751  |
| H | -3.9829146 | 1.4518820  | 2.8359011  |
| H | -4.7875976 | 1.2270560  | 1.2752651  |
| H | -4.2310456 | 2.8430240  | 1.7649871  |
| C | -1.5308226 | 2.1233180  | 2.0344711  |
| H | -1.6724426 | 3.2016450  | 2.1573311  |
| H | -0.5439496 | 1.9366830  | 1.6053441  |
| H | -1.5635376 | 1.6515960  | 3.0205751  |
| N | 0.8202974  | -0.0266000 | 0.7162751  |
| N | 1.3039454  | -0.9152390 | 1.5244121  |
| C | 1.8873754  | 0.6368880  | 0.0455121  |
| C | 2.7597244  | -0.9407350 | 1.4148921  |
| O | 1.7769424  | 1.5913310  | -0.6806089 |
| O | 3.4909714  | -1.6346800 | 2.0715191  |
| N | 3.0788504  | 0.0334830  | 0.4838661  |
| C | 4.3928784  | 0.3759170  | 0.0625301  |
| C | 5.3513124  | -0.6270550 | -0.0786389 |
| C | 4.7121424  | 1.7055320  | -0.2094569 |
| C | 6.6369224  | -0.2918050 | -0.4873699 |
| H | 5.0977854  | -1.6556600 | 0.1476361  |
| C | 5.9984434  | 2.0234240  | -0.6309369 |
| H | 3.9572404  | 2.4746450  | -0.1087769 |

|   |            |            |            |
|---|------------|------------|------------|
| C | 6.9644634  | 1.0313540  | -0.7685749 |
| H | 7.3840194  | -1.0729300 | -0.5887509 |
| H | 6.2440354  | 3.0585830  | -0.8470309 |
| H | 7.9686714  | 1.2874910  | -1.0920269 |
| C | -2.1326186 | -2.4135850 | -1.2619489 |
| C | -2.9493866 | -1.7637090 | -2.3473189 |
| H | -1.7857266 | -3.4235800 | -1.4717629 |
| H | -3.1040246 | -2.3214270 | -3.2656739 |
| H | -2.8510686 | -0.6912860 | -2.4821809 |
| C | -3.6213326 | -2.2568270 | -1.0927599 |
| H | -4.2353436 | -3.1502910 | -1.1502799 |
| H | -3.9752616 | -1.5182390 | -0.3783119 |

E<sub>gas</sub> = -1421.38288820

E<sub>THF</sub> = -1421.41299828

G<sub>gas</sub> = -1420.944557

G<sub>THF</sub> = -1420.974667

Imaginary frequency = -379.0411

**12a-anti**

|   |            |            |            |
|---|------------|------------|------------|
| C | -0.3175722 | 0.0249612  | 0.7323906  |
| C | 0.6850408  | -0.9858998 | 0.2225116  |
| C | 0.2569598  | -1.5607148 | -1.1291494 |
| C | -0.8173482 | -0.8685508 | -1.8285984 |
| C | -1.2782822 | 0.3675652  | -1.4508024 |
| C | -1.0014942 | 0.8501142  | -0.1548644 |
| H | -0.1693942 | 0.3615602  | 1.7525586  |
| H | -1.1772512 | -1.3169958 | -2.7503184 |
| H | -1.9775852 | 0.9017672  | -2.0868134 |
| H | -1.4634412 | 1.7635132  | 0.2033416  |
| C | 0.8396148  | -2.6279958 | -1.6890684 |
| H | 1.6502688  | -3.1580858 | -1.2029114 |
| H | 0.5142008  | -2.9962178 | -2.6574744 |
| B | 2.0264269  | -0.1363108 | 0.0168016  |
| O | 3.0051038  | -0.4561108 | -0.8770714 |
| O | 2.3091118  | 0.9811902  | 0.7549426  |
| C | 3.4583218  | 1.6092872  | 0.1418406  |
| C | 4.1351088  | 0.4036662  | -0.5953984 |
| C | 4.3055388  | 2.2565162  | 1.2266936  |
| H | 5.2246689  | 2.6702712  | 0.7977906  |
| H | 4.5737838  | 1.5415732  | 2.0072226  |
| H | 3.7483348  | 3.0747592  | 1.6917436  |
| C | 2.9133219  | 2.6711852  | -0.8145424 |
| H | 3.7209938  | 3.2404262  | -1.2845454 |
| H | 2.2825868  | 3.3632132  | -0.2497114 |
| H | 2.2995879  | 2.2193782  | -1.6003904 |
| C | 5.0846589  | -0.3916138 | 0.3011146  |
| H | 5.3461779  | -1.3266408 | -0.2025564 |
| H | 4.6150598  | -0.6403328 | 1.2581876  |
| H | 6.0064758  | 0.1636572  | 0.4995806  |
| C | 4.8177318  | 0.7568652  | -1.9080844 |
| H | 5.6210228  | 1.4824292  | -1.7397594 |
| H | 4.1098779  | 1.1761322  | -2.6260644 |
| H | 5.2560868  | -0.1426178 | -2.3495394 |

N -1.9286392 -1.1525288 1.0822326  
N -2.1976981 -1.9153678 0.0801456  
C -3.0205362 -0.2040788 1.3034266  
C -3.4673812 -1.5414338 -0.4655764  
O -3.0810402 0.5829212 2.2109986  
O -4.0321512 -2.0903108 -1.3751334  
N -3.9527222 -0.4802058 0.3186896  
C -5.1941412 0.1877072 0.1397776  
C -6.3128541 -0.5294838 -0.2824814  
C -5.2813861 1.5575422 0.3862046  
C -7.5198512 0.1357902 -0.4641794  
H -6.2303612 -1.5903758 -0.4812574  
C -6.4985601 2.2064212 0.2127706  
H -4.4105012 2.1027322 0.7296176  
C -7.6194701 1.5014862 -0.2156894  
H -8.3888601 -0.4228458 -0.7978944  
H -6.5673062 3.2715622 0.4114446  
H -8.5667502 2.0133922 -0.3540614  
C 0.9054368 -2.0946528 1.2547336  
C 1.6956969 -1.8494288 2.5115716  
H 0.0308358 -2.7303868 1.3580916  
H 1.3234829 -2.2791588 3.4358096  
H 2.1774908 -0.8824518 2.6331286  
C 2.2322008 -2.7772048 1.4510666  
H 2.2208529 -3.8446808 1.6483936  
H 3.0805139 -2.4469038 0.8591116

$E_{\text{gas}} = -1421.38206737$

$E_{\text{THF}} = -1421.41574754$

$G_{\text{gas}} = -1420.945165$

$G_{\text{THF}} = -1420.978846$

Imaginary frequency = -302.7626

### 12b-syn

C 0.5616402 -0.8182934 -0.4329633  
C -0.5587548 -0.4367094 0.5125697  
C -0.1535478 -0.7660684 1.9484307  
C 1.0876692 -1.5438264 2.1286487  
C 1.6357062 -2.3059874 1.0914837  
C 1.4013672 -1.8873274 -0.2235583  
H 0.5505162 -0.3417824 -1.4074533  
H 1.3634692 -1.7841994 3.1502037  
H 2.3899892 -3.0527264 1.3141777  
H 2.0187312 -2.2665644 -1.0332253  
C -0.7832368 -0.3437394 3.0509117  
H -1.6378288 0.3192636 3.0167797  
H -0.4142998 -0.6184914 4.0353277  
B -0.7423548 1.1363156 0.3141657  
O -1.1234528 2.0279216 1.2752597  
O -0.5915808 1.7078356 -0.9207823  
C -1.0197608 3.0802446 -0.8244493  
C -0.9365698 3.3499556 0.7199117  
C -2.4463108 3.1343796 -1.3741643

H -2.8326398 4.1581146 -1.3968693  
H -3.1259628 2.5184036 -0.7761113  
H -2.4454778 2.7418786 -2.3953493  
C -0.0897288 3.9369006 -1.6717263  
H -0.2972928 5.0016966 -1.5186693  
H -0.2403728 3.7088206 -2.7310453  
H 0.9558812 3.7362866 -1.4301313  
C -2.0210818 4.2669866 1.2666377  
H -1.8827918 4.3973956 2.3438287  
H -3.0192498 3.8560656 1.0994067  
H -1.9621478 5.2534026 0.7939407  
C 0.4427682 3.8290396 1.1733527  
H 0.6381352 4.8525696 0.8385277  
H 1.2289892 3.1695486 0.7971367  
H 0.4808362 3.8056026 2.2661967  
N 1.9639842 0.6629136 0.7766497  
N 2.3267892 0.0169516 1.8460497  
C 3.0271972 0.6316246 -0.1749453  
C 3.6537142 -0.5454404 1.6538157  
O 3.0528702 1.2253536 -1.2220653  
O 4.2689912 -1.1677014 2.4808887  
N 4.0548662 -0.1411274 0.3899877  
C 5.2981372 -0.4424284 -0.2285753  
C 6.4570002 -0.5207614 0.5426577  
C 5.3449982 -0.6626774 -1.6049373  
C 7.6654402 -0.8258304 -0.0736063  
H 6.4065142 -0.3602224 1.6122677  
C 6.5628452 -0.9539644 -2.2083043  
H 4.4407602 -0.5847904 -2.1961453  
C 7.7252142 -1.0394794 -1.4474293  
H 8.5669152 -0.8902794 0.5279397  
H 6.5995882 -1.1172664 -3.2810153  
H 8.6732752 -1.2697294 -1.9235143  
C -4.3276278 -2.8002384 0.6929167  
H -5.2501708 -3.3199674 0.4028847  
H -4.2220268 -2.9093304 1.7802717  
C -4.4178398 -1.3135874 0.3200127  
H -5.2687238 -0.8539484 0.8373437  
C -3.1199658 -3.4271414 -0.0184443  
H -3.0411468 -4.4874644 0.2503487  
C -3.2996498 -3.2915594 -1.5376643  
H -4.2076998 -3.8181574 -1.8594153  
H -2.4530038 -3.7565134 -2.0598933  
C -4.5946108 -1.1685834 -1.1973153  
H -4.6734588 -0.1066544 -1.4664263  
H -5.5245408 -1.6550154 -1.5196153  
C -3.3906558 -1.8034104 -1.9056673  
H -3.5033048 -1.6966894 -2.9913063  
C -2.0996328 -1.0935774 -1.4707313  
H -1.2557318 -1.5564454 -1.9969963  
H -2.1244118 -0.0404694 -1.7721853  
C -3.1290548 -0.6013504 0.7570497  
H -3.0240058 -0.6970744 1.8419657

H -3.2071258 0.4712916 0.5368557  
C -1.8322248 -2.7071044 0.4179047  
H -1.6938108 -2.8237024 1.4996437  
H -0.9692398 -3.1748154 -0.0705743  
C -1.8906898 -1.2065464 0.0589157  
E<sub>gas</sub> = -1694.22005979  
E<sub>THF</sub> = -1694.25263188  
G<sub>gas</sub> = -1693.623375  
G<sub>THF</sub> = -1693.655947  
Imaginary frequency = -387.4052

### 12b-anti

C -0.6787863 -0.2955042 -0.4547468  
C 0.4423807 0.1018878 0.4820292  
C -0.0366053 -0.0043622 1.9360252  
C -1.3305083 -0.6460672 2.1630632  
C -1.9304773 -1.4619712 1.2324752  
C -1.5777263 -1.3035572 -0.1162378  
H -0.5161193 -0.1208412 -1.5095108  
H -1.7253093 -0.6081942 3.1739552  
H -2.7808233 -2.0763832 1.5115502  
H -2.1368333 -1.8061792 -0.8984178  
C 0.6653717 0.3441318 3.0228542  
H 1.6597737 0.7683008 2.9773792  
H 0.2503507 0.1965108 4.0153072  
B 1.4437107 -1.1264532 0.2213692  
O 1.9652487 -1.9116272 1.2046612  
O 1.8033077 -1.5255882 -1.0406058  
C 2.4050257 -2.8325112 -0.9116238  
C 2.8906167 -2.8302142 0.5806682  
C 3.5101117 -2.9718172 -1.9472938  
H 4.0290707 -3.9288992 -1.8273208  
H 4.2408107 -2.1641442 -1.8674808  
H 3.0778167 -2.9407162 -2.9515478  
C 1.2928267 -3.8482612 -1.1793778  
H 1.6708777 -4.8747692 -1.1530738  
H 0.8713997 -3.6581772 -2.1705618  
H 0.4861767 -3.7520322 -0.4453578  
C 4.2922087 -2.2480322 0.7655412  
H 4.4676277 -2.0862072 1.8326902  
H 4.4008827 -1.2861132 0.2568382  
H 5.0589677 -2.9310112 0.3868802  
C 2.7883437 -4.1746422 1.2869012  
H 3.4090547 -4.9221292 0.7809892  
H 1.7582857 -4.5351252 1.3175302  
H 3.1435677 -4.0761302 2.3166942  
N -2.0681153 1.2094298 -0.1226768  
N -2.3639493 1.3002788 1.1321582  
C -3.2178713 0.7325638 -0.8746148  
C -3.7214393 0.8736688 1.3248772  
O -3.2586473 0.6114848 -2.0714198  
O -4.3182963 0.8784388 2.3698462

N -4.2246823 0.5373558 0.0586112  
C -5.5249253 0.0332518 -0.2141838  
C -6.6175383 0.4948688 0.5187512  
C -5.6946983 -0.9304762 -1.2082418  
C -7.8810823 -0.0233132 0.2571642  
H -6.4740973 1.2360818 1.2946022  
C -6.9660773 -1.4292732 -1.4669588  
H -4.8434723 -1.2702302 -1.7854378  
C -8.0619053 -0.9829932 -0.7343348  
H -8.7298533 0.3328078 0.8328042  
H -7.0960983 -2.1753662 -2.2449418  
H -9.0516873 -1.3811252 -0.9351828  
C 2.7036947 1.3449208 0.4079862  
H 2.8653847 1.1231168 1.4680312  
H 3.1340417 0.5107978 -0.1613108  
C 3.4650267 2.6235248 0.0299962  
H 4.5213167 2.4991418 0.2988772  
C 1.1895087 1.4586658 0.0837952  
C 0.6221667 2.6994268 0.8114372  
H 0.6840147 2.5744638 1.8957172  
H -0.4366963 2.8131738 0.5695662  
C 2.8712877 3.8205498 0.7848132  
H 3.4227617 4.7359388 0.5324772  
H 2.9731657 3.6698828 1.8679432  
C 1.3901947 3.9697878 0.4104352  
H 0.9589077 4.8217868 0.9494562  
C 1.2630247 4.1997668 -1.1015528  
H 0.2078007 4.3297188 -1.3728418  
H 1.7904367 5.1179068 -1.3930668  
C 3.3374407 2.8474878 -1.4824838  
H 3.7787457 2.0013328 -2.0260118  
H 3.8883827 3.7489598 -1.7812018  
C 1.0796737 1.7249768 -1.4385798  
H 1.4658387 0.8637438 -1.9997538  
H 0.0280717 1.8645198 -1.7106898  
C 1.8529387 2.9919508 -1.8419458  
H 1.7466797 3.1338308 -2.9241628  
E<sub>gas</sub> = -1694.21294342  
E<sub>THF</sub> = -1694.24878357  
G<sub>gas</sub> = -1693.615643  
G<sub>THF</sub> = -1693.651484  
Imaginary frequency = -270.2123

### 13a-syn

C -0.2292708 -1.5537043 -1.1363673  
C -1.5067358 -1.5738173 -0.2365633  
C -1.1116108 -2.3218303 1.0361397  
C 0.3736262 -2.6330813 1.0712297  
C 0.6720772 -3.5112624 -0.1279463  
C 0.3463592 -2.9414033 -1.2910933  
H -0.4083828 -1.0297423 -2.0735763  
H 0.7084102 -3.0385583 2.0243607



|   |            |            |            |
|---|------------|------------|------------|
| H | 1.1204702  | -4.4923583 | -0.0165903 |
| H | 0.4955042  | -3.3933023 | -2.2654943 |
| C | -1.9511478 | -2.7263163 | 1.9822397  |
| H | -3.0172479 | -2.5340994 | 1.9096697  |
| H | -1.6003728 | -3.2525403 | 2.8654397  |
| B | -1.7865318 | -0.0360923 | 0.0767697  |
| O | -1.8025809 | 0.5195217  | 1.3210777  |
| O | -1.9835638 | 0.8731917  | -0.9283433 |
| C | -2.2992139 | 2.1383817  | -0.3061483 |
| C | -1.7138108 | 1.9508937  | 1.1366947  |
| C | -3.8218468 | 2.2741657  | -0.3269993 |
| H | -4.1433128 | 3.2432007  | 0.0671127  |
| H | -4.2982478 | 1.4848537  | 0.2630897  |
| H | -4.1726688 | 2.1847427  | -1.3591053 |
| C | -1.6552578 | 3.2526667  | -1.1181603 |
| H | -1.7825578 | 4.2178147  | -0.6158133 |
| H | -2.1310489 | 3.3153557  | -2.1012483 |
| H | -0.5897248 | 3.0695967  | -1.2702513 |
| C | -2.4994928 | 2.6403747  | 2.2418697  |
| H | -2.0159779 | 2.4571997  | 3.2056297  |
| H | -3.5241128 | 2.2668287  | 2.3004197  |
| H | -2.5282658 | 3.7225207  | 2.0738907  |
| C | -0.2303858 | 2.3126207  | 1.2340357  |
| H | -0.0786748 | 3.3951057  | 1.1806697  |
| H | 0.3424252  | 1.8358297  | 0.4337467  |
| H | 0.1591302  | 1.9491787  | 2.1889077  |
| N | 0.7475282  | -0.7470413 | -0.3696073 |
| N | 1.0813352  | -1.3485343 | 0.8697887  |
| C | 1.9038782  | -0.2457233 | -0.9471363 |
| C | 2.4470471  | -1.2375783 | 1.0620447  |
| O | 1.9929462  | 0.2775007  | -2.0339643 |
| O | 3.0849711  | -1.7201493 | 1.9702927  |
| N | 2.9083181  | -0.4297903 | 0.0117397  |
| C | 4.2353672  | 0.0683457  | -0.1162773 |
| C | 5.3198282  | -0.7076023 | 0.2895867  |
| C | 4.4334562  | 1.3416357  | -0.6489643 |
| C | 6.6068862  | -0.1947963 | 0.1658087  |
| H | 5.1543952  | -1.6892013 | 0.7142437  |
| C | 5.7260812  | 1.8336337  | -0.7821333 |
| H | 3.5837972  | 1.9309887  | -0.9717123 |
| C | 6.8161892  | 1.0708657  | -0.3726293 |
| H | 7.4506982  | -0.7967183 | 0.4890267  |
| H | 5.8784402  | 2.8213727  | -1.2060673 |
| H | 7.8238692  | 1.4621887  | -0.4738283 |
| C | -2.6449009 | -2.2874644 | -0.9566273 |
| C | -3.3892288 | -1.6568903 | -2.1045643 |
| H | -2.4813059 | -3.3603623 | -1.0384733 |
| H | -3.6634019 | -2.2969933 | -2.9374423 |
| H | -3.1389138 | -0.6358903 | -2.3729223 |
| C | -4.0827238 | -1.8729553 | -0.7856553 |
| H | -4.8356288 | -2.6513854 | -0.7114243 |
| H | -4.2948838 | -0.9933883 | -0.1823933 |

$E_{\text{gas}} = -1421.45655186$

$E_{\text{THF}} = -1421.48944880$   
 $G_{\text{gas}} = -1421.014848$   
 $G_{\text{THF}} = -1421.047748$

### 13a-anti

|   |            |            |            |
|---|------------|------------|------------|
| C | -0.4533418 | 0.2764752  | 0.3523563  |
| C | 0.6332782  | -0.8331548 | 0.4242963  |
| C | 0.2529982  | -1.8732048 | -0.6331937 |
| C | -1.0043118 | -1.4799448 | -1.3839937 |
| C | -0.7919918 | -0.1001848 | -1.9758837 |
| C | -0.5064118 | 0.8275052  | -1.0563537 |
| H | -0.3112418 | 1.0328052  | 1.1236263  |
| H | -1.3342218 | -2.2352048 | -2.0965537 |
| H | -0.9021918 | 0.0871452  | -3.0388137 |
| H | -0.3434728 | 1.8798552  | -1.2631737 |
| C | 0.9190282  | -2.9958848 | -0.8789937 |
| H | 1.8295382  | -3.2394248 | -0.3404837 |
| H | 0.5735982  | -3.7033448 | -1.6274437 |
| B | 2.0208082  | -0.1514248 | 0.0711763  |
| O | 3.1182382  | -0.8084048 | -0.4132637 |
| O | 2.2354382  | 1.1917052  | 0.2530063  |
| C | 3.4920082  | 1.5048752  | -0.3922537 |
| C | 4.2236282  | 0.1239952  | -0.3690537 |
| C | 4.1862072  | 2.6105152  | 0.3845063  |
| H | 5.1798272  | 2.8054262  | -0.0332637 |
| H | 4.2918872  | 2.3507352  | 1.4397163  |
| H | 3.5993172  | 3.5305352  | 0.3161363  |
| C | 3.1503372  | 1.9705852  | -1.8060337 |
| H | 4.0450972  | 2.2791952  | -2.3545637 |
| H | 2.4700772  | 2.8243352  | -1.7402737 |
| H | 2.6484082  | 1.1754652  | -2.3674037 |
| C | 4.9662782  | -0.1307938 | 0.9406163  |
| H | 5.2825682  | -1.1773538 | 0.9688963  |
| H | 4.3173082  | 0.0537652  | 1.8036763  |
| H | 5.8536782  | 0.5034062  | 1.0262763  |
| C | 5.1333582  | -0.1357738 | -1.5580637 |
| H | 5.9276482  | 0.6170762  | -1.6050937 |
| H | 4.5754682  | -0.1200038 | -2.4961237 |
| H | 5.5992382  | -1.1193938 | -1.4540137 |
| N | -1.7584218 | -0.3757948 | 0.6190763  |
| N | -2.0708618 | -1.3623958 | -0.3549137 |
| C | -2.8849518 | 0.4151142  | 0.8206363  |
| C | -3.3863418 | -1.1742858 | -0.7663337 |
| O | -2.9482918 | 1.3986542  | 1.5191963  |
| O | -3.9510418 | -1.7741558 | -1.6494137 |
| N | -3.9092318 | -0.1828658 | 0.0747163  |
| C | -5.2731818 | 0.2239842  | 0.0764563  |
| C | -6.2653118 | -0.7385058 | -0.1145937 |
| C | -5.6076118 | 1.5641842  | 0.2689063  |
| C | -7.5996718 | -0.3500158 | -0.1170137 |
| H | -5.9878118 | -1.7730658 | -0.2768737 |
| C | -6.9491828 | 1.9331442  | 0.2768663  |

|   |            |            |            |
|---|------------|------------|------------|
| H | -4.8273328 | 2.2977842  | 0.4248163  |
| C | -7.9476618 | 0.9834942  | 0.0817163  |
| H | -8.3703518 | -1.0986968 | -0.2706537 |
| H | -7.2103628 | 2.9750642  | 0.4335963  |
| H | -8.9916618 | 1.2806232  | 0.0841963  |
| C | 0.6523382  | -1.4553748 | 1.8172463  |
| C | 1.3663782  | -0.7563548 | 2.9397563  |
| H | -0.2789418 | -1.9536448 | 2.0748663  |
| H | 0.9074682  | -0.7623948 | 3.9220863  |
| H | 1.8994582  | 0.1612052  | 2.7015963  |
| C | 1.9036282  | -2.0527848 | 2.3932763  |
| H | 1.8007282  | -2.9427748 | 3.0045563  |
| H | 2.8101482  | -2.0220448 | 1.7962363  |

$E_{\text{gas}} = -1421.45551470$

$E_{\text{THF}} = -1421.48822271$

$G_{\text{gas}} = -1420.012029$

$G_{\text{THF}} = -1421.044741$

### 13b-syn

|   |            |            |            |
|---|------------|------------|------------|
| C | 0.3300100  | -1.1217099 | -0.5593713 |
| C | -0.7751970 | -0.6118369 | 0.4317177  |
| C | -0.3709770 | -1.1847749 | 1.7968257  |
| C | 0.9224290  | -1.9901089 | 1.7303857  |
| C | 0.7894780  | -3.0860209 | 0.6978097  |
| C | 0.4798380  | -2.6219179 | -0.5145913 |
| H | 0.2068980  | -0.7093199 | -1.5574063 |
| H | 1.2556290  | -2.3303379 | 2.7091807  |
| H | 0.9621830  | -4.1278459 | 0.9436677  |
| H | 0.3644690  | -3.2325889 | -1.4039083 |
| C | -0.9654170 | -0.9917899 | 2.9707527  |
| H | -1.8544930 | -0.3831759 | 3.0849527  |
| H | -0.5565170 | -1.4243299 | 3.8797137  |
| B | -0.5406030 | 0.9680841  | 0.4247957  |
| O | -0.3188110 | 1.7441891  | 1.5240647  |
| O | -0.4872350 | 1.6679311  | -0.7516203 |
| C | -0.3123340 | 3.0622601  | -0.4255413 |
| C | 0.2218140  | 2.9973411  | 1.0502197  |
| C | -1.6854670 | 3.7239071  | -0.5449733 |
| H | -1.6220780 | 4.8052341  | -0.3881213 |
| H | -2.3932350 | 3.3099671  | 0.1801167  |
| H | -2.0809610 | 3.5414891  | -1.5484493 |
| C | 0.6571260  | 3.6690611  | -1.4303983 |
| H | 0.9065450  | 4.6996931  | -1.1549743 |
| H | 0.1962770  | 3.6832691  | -2.4223873 |
| H | 1.5767700  | 3.0840601  | -1.4961863 |
| C | -0.2638720 | 4.1180081  | 1.9579447  |
| H | 0.1543300  | 3.9839741  | 2.9596987  |
| H | -1.3525990 | 4.1265921  | 2.0433257  |
| H | 0.0672550  | 5.0903131  | 1.5769757  |
| C | 1.7442900  | 2.8715461  | 1.1378497  |
| H | 2.2411620  | 3.8061871  | 0.8601117  |
| H | 2.1097900  | 2.0699611  | 0.4903377  |

|   |            |            |            |
|---|------------|------------|------------|
| H | 2.0165650  | 2.6222061  | 2.1670247  |
| N | 1.5912600  | -0.5350949 | -0.0439443 |
| N | 1.9403020  | -1.0385749 | 1.2309887  |
| C | 2.7363180  | -0.4785669 | -0.8254323 |
| C | 3.2914470  | -1.3276299 | 1.2454757  |
| O | 2.7947850  | -0.1463999 | -1.9872603 |
| O | 3.9029950  | -1.8605929 | 2.1436907  |
| N | 3.7881760  | -0.8360199 | 0.0274567  |
| C | 5.1646920  | -0.7777839 | -0.3297043 |
| C | 6.0414890  | -1.7755889 | 0.0931497  |
| C | 5.6233010  | 0.2916251  | -1.0983133 |
| C | 7.3865590  | -1.6893179 | -0.2501453 |
| H | 5.6766570  | -2.5944239 | 0.6996037  |
| C | 6.9668640  | 0.3550811  | -1.4472543 |
| H | 4.9292610  | 1.0528991  | -1.4332243 |
| C | 7.8536260  | -0.6299109 | -1.0214853 |
| H | 8.0710440  | -2.4616479 | 0.0869947  |
| H | 7.3208370  | 1.1846801  | -2.0515383 |
| H | 8.9041240  | -0.5709179 | -1.2893073 |
| C | -5.0869690 | -1.6735759 | 0.5284887  |
| H | -6.1195640 | -1.8836649 | 0.2203697  |
| H | -5.0499150 | -1.7673929 | 1.6218787  |
| C | -4.6896210 | -0.2512969 | 0.1089177  |
| H | -5.3641040 | 0.4755191  | 0.5777167  |
| C | -4.1238470 | -2.6791689 | -0.1178583 |
| H | -4.3976730 | -3.6977769 | 0.1828777  |
| C | -4.2050800 | -2.5527679 | -1.6458943 |
| H | -5.2237480 | -2.7721549 | -1.9917413 |
| H | -3.5372100 | -3.2840679 | -2.1202443 |
| C | -4.7650320 | -0.1192689 | -1.4179093 |
| H | -4.4975380 | 0.9019221  | -1.7206113 |
| H | -5.7901950 | -0.3026419 | -1.7653283 |
| C | -3.8018810 | -1.1291599 | -2.0563323 |
| H | -3.8398220 | -1.0337839 | -3.1482303 |
| C | -2.3642000 | -0.8523259 | -1.5870183 |
| H | -1.7036690 | -1.5840159 | -2.0701643 |
| H | -2.0429810 | 0.1435701  | -1.9140823 |
| C | -3.2523330 | 0.0344241  | 0.5684027  |
| H | -3.2080460 | -0.0062589 | 1.6614647  |
| H | -2.9832520 | 1.0571781  | 0.2730927  |
| C | -2.6869580 | -2.3947539 | 0.3491797  |
| H | -2.6206740 | -2.5195729 | 1.4350907  |
| H | -2.0090280 | -3.1319569 | -0.0940593 |
| C | -2.2434580 | -0.9683419 | -0.0472993 |

$E_{\text{gas}} = -1694.29028040$

$E_{\text{THF}} = -1694.32538820$

$G_{\text{gas}} = -1693.687310$

$G_{\text{THF}} = -1693.722418$

### 13b-anti

|   |            |            |            |
|---|------------|------------|------------|
| C | -0.6404542 | -0.7810943 | -0.3613552 |
| C | 0.5030348  | -0.1494253 | 0.4977308  |

|   |            |            |            |                                   |            |            |            |
|---|------------|------------|------------|-----------------------------------|------------|------------|------------|
| C | 0.1062238  | -0.4318033 | 1.9549398  | H                                 | 3.6545628  | -3.7911403 | 1.4341198  |
| C | -1.2503292 | -1.1093183 | 2.0601298  | H                                 | 4.9331308  | -2.6858053 | 1.9548588  |
| C | -1.1458932 | -2.4158803 | 1.2987108  | H                                 | -6.1095992 | 0.5386987  | 1.5746208  |
| C | -0.8152332 | -2.2373213 | 0.0178148  | H                                 | -5.1117402 | -1.5291673 | -2.0506972 |
| C | 0.8416668  | -0.2343823 | 3.0458518  | H                                 | -8.5114522 | 0.3763327  | 1.0092158  |
| B | 1.8024258  | -0.9925283 | 0.1265748  | H                                 | -7.5135362 | -1.6888863 | -2.6205042 |
| O | 2.7920748  | -1.3453283 | 0.9993258  | H                                 | -9.2255552 | -0.7404993 | -1.0917172 |
| O | 2.0078058  | -1.4842533 | -1.1388712 | H                                 | 2.3958668  | 1.5951317  | 1.5885438  |
| C | 3.0780358  | -2.4510003 | -1.0489352 | H                                 | 2.8940348  | 1.1661857  | -0.0451552 |
| C | 3.8403398  | -1.9836993 | 0.2397968  | H                                 | 3.5209628  | 3.4852387  | 0.4760518  |
| C | 3.8962878  | -2.4073493 | -2.3306062 | H                                 | -0.0631152 | 2.1692997  | 2.0517028  |
| C | 2.4172328  | -3.8213623 | -0.8887772 | H                                 | -1.2442192 | 2.0972547  | 0.7492698  |
| C | 4.9096448  | -0.9266873 | -0.0398932 | H                                 | 1.7330488  | 5.2118237  | 0.8025188  |
| C | 4.4290668  | -3.1077583 | 1.0805878  | H                                 | 1.6901388  | 4.0005407  | 2.0889628  |
| N | -1.9000362 | -0.0955423 | -0.0137672 | H                                 | -0.6069702 | 4.4347087  | 1.2212788  |
| N | -2.2360862 | -0.2611373 | 1.3517788  | H                                 | -1.1759352 | 3.8220807  | -1.1278502 |
| C | -3.0408162 | -0.2511053 | -0.7791322 | H                                 | 0.0418108  | 5.1027027  | -1.1014392 |
| C | -3.5912752 | -0.5477273 | 1.4373088  | H                                 | 2.9639568  | 2.8750557  | -1.8755462 |
| O | -3.0953522 | -0.2319533 | -1.9890562 | H                                 | 2.4846528  | 4.5443577  | -1.5458642 |
| O | -4.1995462 | -0.8380403 | 2.4417648  | H                                 | 1.1822588  | 1.0236687  | -1.9224252 |
| N | -4.0920122 | -0.3923443 | 0.1369588  | H                                 | -0.5040992 | 1.4627297  | -1.6135202 |
| C | -5.4707812 | -0.4863283 | -0.2046722 | H                                 | 0.6612668  | 3.3073567  | -2.7314362 |
| C | -6.4230292 | 0.0598537  | 0.6550528  | $E_{\text{gas}} = -1694.29124174$ |            |            |            |
| C | -5.8598582 | -1.1213313 | -1.3833262 | $E_{\text{THF}} = -1694.3266658$  |            |            |            |
| C | -7.7712522 | -0.0409413 | 0.3334738  | $G_{\text{gas}} = -1693.687838$   |            |            |            |
| C | -7.2120422 | -1.1998803 | -1.6992132 | $G_{\text{THF}} = -1693.723262$   |            |            |            |
| C | -8.1711042 | -0.6669163 | -0.8437292 |                                   |            |            |            |
| C | 2.1947228  | 1.7864477  | 0.5288038  |                                   |            |            |            |
| C | 2.4812928  | 3.2601077  | 0.2078408  | <b>14a</b>                        |            |            |            |
| C | 0.7375368  | 1.3951247  | 0.1813838  | C                                 | -2.2528029 | -0.7534548 | -1.3023973 |
| C | -0.2011682 | 2.3320977  | 0.9778578  | C                                 | -1.6851039 | -0.0458208 | -0.1540143 |
| C | 1.5293338  | 4.1537477  | 1.0137038  | C                                 | -2.2825449 | -0.4090168 | 1.1419217  |
| C | 0.0810148  | 3.8058447  | 0.6434748  | C                                 | -3.6319999 | -0.7915808 | 1.2284177  |
| C | -0.1362042 | 4.0469327  | -0.8574482 | C                                 | -4.1868609 | -1.2844718 | 0.0669957  |
| C | 2.2703138  | 3.4974457  | -1.2940352 | C                                 | -3.4722069 | -1.3461538 | -1.1739123 |
| C | 0.5308878  | 1.6782077  | -1.3264482 | H                                 | -1.7491429 | -0.7109238 | -2.2648683 |
| C | 0.8208608  | 3.1511827  | -1.6579062 | H                                 | -4.1499809 | -0.8746038 | 2.1794017  |
| H | -0.4804982 | -0.6463763 | -1.4267042 | H                                 | -5.1825609 | -1.7201618 | 0.1039997  |
| H | -1.5976962 | -1.2123543 | 3.0865618  | H                                 | -3.9468579 | -1.8346258 | -2.0194923 |
| H | -1.3483312 | -3.3712543 | 1.7700768  | C                                 | -1.1800099 | -0.3424698 | 2.0382817  |
| H | -0.7099802 | -3.0277563 | -0.7167102 | H                                 | -1.2991369 | -0.0236378 | 3.0768407  |
| H | 1.8559498  | 0.1439927  | 3.0011998  | H                                 | -0.6300089 | -1.2874628 | 1.9866447  |
| H | 0.4486928  | -0.4686313 | 4.0316318  | B                                 | -0.0900959 | -0.1330898 | 0.4804257  |
| H | 4.7584748  | -3.0790103 | -2.2570942 | O                                 | 0.8306841  | 0.9198452  | 0.3467807  |
| H | 4.2547878  | -1.3986553 | -2.5455542 | O                                 | 0.5872011  | -1.3619578 | 0.2351357  |
| H | 3.2798048  | -2.7347673 | -3.1727712 | C                                 | 1.8666951  | -1.0550628 | -0.3104873 |
| H | 3.1600888  | -4.6242923 | -0.8652672 | C                                 | 2.1453441  | 0.3614462  | 0.2860287  |
| H | 1.7488638  | -3.9934253 | -1.7376722 | C                                 | 1.7324261  | -1.0340628 | -1.8379503 |
| H | 1.8207408  | -3.8670173 | 0.0279918  | H                                 | 2.6973871  | -0.8852608 | -2.3338723 |
| H | 5.2172318  | -0.4754673 | 0.9075848  | H                                 | 1.0494421  | -0.2400148 | -2.1585303 |
| H | 4.5305968  | -0.1308793 | -0.6873062 | H                                 | 1.3167061  | -1.9917468 | -2.1653993 |
| H | 5.7894828  | -1.3691903 | -0.5171872 | C                                 | 2.8606881  | -2.1307348 | 0.1094027  |
| H | 5.1649918  | -3.6771373 | 0.5025348  | H                                 | 3.8765561  | -1.8701588 | -0.2092773 |

|   |            |            |            |
|---|------------|------------|------------|
| H | 2.5921161  | -3.0844598 | -0.3553363 |
| H | 2.8576951  | -2.2703738 | 1.1927837  |
| C | 3.0215951  | 1.2616362  | -0.5759313 |
| H | 3.1551271  | 2.2304242  | -0.0847463 |
| H | 2.5691841  | 1.4386812  | -1.5545693 |
| H | 4.0107231  | 0.8132202  | -0.7230653 |
| C | 2.6970051  | 0.3044992  | 1.7137717  |
| H | 3.7357121  | -0.0415258 | 1.7334857  |
| H | 2.0942021  | -0.3604388 | 2.3399067  |
| H | 2.6560771  | 1.3076182  | 2.1483247  |
| C | -2.0573989 | 1.4609652  | -0.3654303 |
| C | -1.2134489 | 2.4533652  | -1.1145133 |
| H | -3.1273049 | 1.5449402  | -0.5530823 |
| H | -1.7150049 | 3.0947942  | -1.8335553 |
| H | -0.2015789 | 2.1621212  | -1.3719463 |
| C | -1.4781469 | 2.6411562  | 0.3584967  |
| H | -2.1819109 | 3.4066892  | 0.6723717  |
| H | -0.6384609 | 2.4818692  | 1.0229577  |

$E_{\text{gas}} = -798.800067942$

$E_{\text{THF}} = -798.815603692$

$G_{\text{gas}} = -798.521084$

$G_{\text{THF}} = -798.536620$

Imaginary frequency = -565.2303

|    |            |            |            |
|----|------------|------------|------------|
| C  | 3.1081406  | 1.1939321  | -0.4468414 |
| H  | 3.2668686  | 2.1322231  | 0.1069196  |
| H  | 2.7269126  | 1.4201791  | -1.4489074 |
| H  | 4.0979246  | 0.7442611  | -0.5670454 |
| C  | 2.6214336  | 0.1388091  | 1.7749656  |
| H  | 3.6377266  | -0.2590749 | 1.8409646  |
| H  | 1.9550626  | -0.5193989 | 2.3381316  |
| H  | 2.6111766  | 1.1229191  | 2.2556686  |
| C  | -2.1472834 | 1.4020631  | -0.3990154 |
| C  | -1.2706164 | 2.3559451  | -1.1514944 |
| H  | -3.2150734 | 1.4903381  | -0.5822144 |
| H  | -1.7405024 | 3.0753781  | -1.8135774 |
| H  | -0.3497084 | 1.9294551  | -1.5487414 |
| C  | -1.5319164 | 2.5401561  | 0.3521786  |
| H  | -2.1788584 | 3.3682391  | 0.6209716  |
| H  | -0.8288994 | 2.2625391  | 1.1362206  |
| Li | 0.8087706  | 2.6798601  | -0.0213084 |

$E_{\text{gas}} = -806.190374218$

$E_{\text{THF}} = -806.272796603$

$E_{\text{CHCl}_3} = -806.268853636$

$G_{\text{gas}} = -805.866991$

$G_{\text{THF}} = -805.949414$

$G_{\text{CHCl}_3} = -805.945470$

Imaginary frequency = -544.5417

#### 14a<sub>Li</sub><sup>+</sup>

|   |            |            |            |
|---|------------|------------|------------|
| C | -2.3113284 | -0.8133499 | -1.3204874 |
| C | -1.7104704 | -0.0829939 | -0.1868044 |
| C | -2.2866314 | -0.4406259 | 1.1368606  |
| C | -3.6510544 | -0.7606359 | 1.2496686  |
| C | -4.2343084 | -1.2520679 | 0.1028966  |
| C | -3.5423244 | -1.3598689 | -1.1549014 |
| H | -1.8156684 | -0.8247759 | -2.2874104 |
| H | -4.1553104 | -0.8215409 | 2.2086656  |
| H | -5.2402694 | -1.6590929 | 0.1626486  |
| H | -4.0442024 | -1.8606669 | -1.9760564 |
| C | -1.1728524 | -0.3995859 | 2.0092496  |
| H | -1.2740924 | -0.1437679 | 3.0658586  |
| H | -0.6113914 | -1.3351919 | 1.9004166  |
| B | -0.1283684 | -0.1911459 | 0.3961936  |
| O | 0.8531676  | 0.8780861  | 0.3147206  |
| O | 0.5556066  | -1.3830779 | 0.1055726  |
| C | 1.8763776  | -1.1028089 | -0.3592944 |
| C | 2.1742006  | 0.2666541  | 0.3212506  |
| C | 1.8244206  | -1.0079819 | -1.8870594 |
| H | 2.8170896  | -0.8662419 | -2.3255084 |
| H | 1.1750086  | -0.1878989 | -2.2160604 |
| H | 1.4073086  | -1.9387449 | -2.2795944 |
| C | 2.8074866  | -2.2288139 | 0.0680676  |
| H | 3.8478396  | -1.9953519 | -0.1828114 |
| H | 2.5319586  | -3.1487189 | -0.4540524 |
| H | 2.7366516  | -2.4176159 | 1.1410976  |

#### 14a<sub>LiB(CH<sub>3</sub>)<sub>4</sub></sub>

|   |            |            |            |
|---|------------|------------|------------|
| C | 3.5754591  | -0.7289251 | -1.2919045 |
| C | 2.5919541  | -0.8187151 | -0.2076615 |
| C | 3.1691282  | -1.0738651 | 1.1280355  |
| C | 4.3372322  | -1.8429481 | 1.2613935  |
| C | 5.1491742  | -1.8887821 | 0.1484985  |
| C | 4.8114672  | -1.2622721 | -1.0972925 |
| H | 3.2810022  | -0.3284321 | -2.2584705 |
| H | 4.6774661  | -2.2187541 | 2.2215425  |
| H | 6.1276952  | -2.3549171 | 0.2340465  |
| H | 5.5514991  | -1.2622261 | -1.8911325 |
| C | 2.3152962  | -0.3414881 | 1.9992205  |
| H | 2.0838561  | -0.6947391 | 3.0068915  |
| H | 2.6574042  | 0.6979079  | 2.0283695  |
| B | 1.5873372  | 0.4224699  | 0.3922295  |
| O | 0.1723632  | 0.5405119  | 0.1809055  |
| O | 2.1603602  | 1.7051599  | 0.2238665  |
| C | 1.1732222  | 2.5888459  | -0.2963215 |
| C | -0.1417298 | 1.9636829  | 0.2478515  |
| C | 1.2604732  | 2.5447009  | -1.8264365 |
| H | 0.5934402  | 3.2738889  | -2.2966845 |
| H | 1.0090322  | 1.5490949  | -2.2081675 |
| H | 2.2885562  | 2.7729359  | -2.1225525 |
| C | 1.4543512  | 4.0008119  | 0.2013205  |
| H | 0.6498292  | 4.6851439  | -0.0895435 |
| H | 2.3869041  | 4.3664399  | -0.2388265 |

|    |            |            |            |
|----|------------|------------|------------|
| H  | 1.5618342  | 4.0243219  | 1.2879255  |
| C  | -1.3724338 | 2.2549389  | -0.5922755 |
| H  | -2.2633529 | 1.8084749  | -0.1436395 |
| H  | -1.2735018 | 1.8673889  | -1.6085475 |
| H  | -1.5340478 | 3.3368519  | -0.6489385 |
| C  | -0.4037758 | 2.3181949  | 1.7117635  |
| H  | -0.6926868 | 3.3687819  | 1.8121605  |
| H  | 0.4810152  | 2.1407519  | 2.3301205  |
| H  | -1.2225788 | 1.7046029  | 2.0945625  |
| C  | 1.7519452  | -2.1010841 | -0.4997685 |
| C  | 0.4513872  | -2.0452091 | -1.2448415 |
| H  | 2.3943882  | -2.9530061 | -0.7129665 |
| H  | 0.2260222  | -2.8362681 | -1.9521405 |
| H  | 0.1041722  | -1.0626931 | -1.5490605 |
| C  | 0.4856422  | -2.4187721 | 0.2253915  |
| H  | 0.2957762  | -3.4573751 | 0.4731085  |
| H  | 0.1635422  | -1.7238491 | 0.9962655  |
| Li | -1.4644128 | -0.7213201 | -0.0189725 |
| C  | -5.2442049 | -1.1577541 | 0.0708715  |
| H  | -5.6302328 | -1.6565511 | 0.9720465  |
| H  | -5.6724809 | -0.1437411 | 0.0623805  |
| H  | -5.6717919 | -1.6884701 | -0.7924795 |
| C  | -3.0460429 | -2.6978111 | 0.0988615  |
| H  | -3.3371269 | -3.1786281 | 1.0436645  |
| H  | -3.4872249 | -3.2894401 | -0.7156355 |
| H  | -1.9575798 | -2.8593731 | 0.0072155  |
| C  | -3.1978189 | -0.4544031 | -1.4460215 |
| H  | -3.6563199 | -1.0952211 | -2.2099295 |
| H  | -3.6400169 | 0.5442829  | -1.5615825 |
| H  | -2.1513129 | -0.3431291 | -1.8080965 |
| C  | -3.1263759 | -0.3060221 | 1.4133005  |
| H  | -2.0743119 | -0.2896361 | 1.7733975  |
| H  | -3.4499908 | 0.7451869  | 1.4030925  |
| H  | -3.6560979 | -0.7847771 | 2.2461095  |
| B  | -3.6127769 | -1.1447721 | 0.0334805  |

$E_{\text{gas}} = -990.923080058$

$E_{\text{THF}} = -990.947834638$

$E_{\text{CHCl}_3} = -990.950052782$

$G_{\text{gas}} = -990.455254$

$G_{\text{THF}} = -990.480009$

$G_{\text{CHCl}_3} = -990.482227$

Imaginary frequency = -560.2586

#### 14a<sub>Li(THF)<sub>2</sub><sup>+</sup></sub>

|   |            |            |            |
|---|------------|------------|------------|
| C | -3.6521601 | -0.5735194 | 1.8317433  |
| C | -2.6462021 | -0.8251084 | 0.7859653  |
| C | -3.1188711 | -1.7010114 | -0.3119957 |
| C | -4.0359841 | -2.7327464 | -0.0542017 |
| C | -4.8307671 | -2.5518024 | 1.0570943  |
| C | -4.6979221 | -1.4327454 | 1.9485273  |

|    |            |            |            |
|----|------------|------------|------------|
| H  | -3.4972401 | 0.2240596  | 2.5534933  |
| H  | -4.2515041 | -3.5117824 | -0.7786217 |
| H  | -5.6518971 | -3.2427024 | 1.2300603  |
| H  | -5.4326531 | -1.3140374 | 2.7379793  |
| B  | -1.9852191 | 0.2978846  | -0.2953347 |
| O  | -0.6282001 | 0.7777006  | -0.2605397 |
| O  | -2.8121811 | 1.4080846  | -0.5615197 |
| C  | -2.0614991 | 2.6087406  | -0.3964867 |
| C  | -0.6246571 | 2.1409746  | -0.7686617 |
| C  | -2.1755881 | 3.0449786  | 1.0681833  |
| H  | -1.6863251 | 4.0073866  | 1.2475713  |
| H  | -1.7373651 | 2.3003976  | 1.7426173  |
| H  | -3.2347071 | 3.1470066  | 1.3192473  |
| C  | -2.6326681 | 3.6835206  | -1.3110507 |
| H  | -2.0121201 | 4.5861496  | -1.2921697 |
| H  | -3.6360701 | 3.9554536  | -0.9723537 |
| H  | -2.7111461 | 3.3288406  | -2.3408247 |
| C  | 0.5050019  | 2.8996316  | -0.0857627 |
| H  | 1.4770389  | 2.5457666  | -0.4522587 |
| H  | 0.4742379  | 2.7810246  | 1.0007243  |
| H  | 0.4466189  | 3.9671726  | -0.3195927 |
| C  | -0.3833491 | 2.0843166  | -2.2756177 |
| H  | -0.3376531 | 3.0890136  | -2.7053187 |
| H  | -1.1743151 | 1.5250686  | -2.7836027 |
| H  | 0.5741769  | 1.5932576  | -2.4752027 |
| C  | -1.5340331 | -1.6632214 | 1.4944153  |
| C  | -0.3063861 | -1.0336484 | 2.0773003  |
| H  | -1.9640031 | -2.4822874 | 2.0662173  |
| H  | 0.0525249  | -1.4128804 | 3.0288153  |
| H  | -0.1815761 | 0.0366156  | 1.9469263  |
| C  | -0.2036071 | -1.9607864 | 0.8757333  |
| H  | 0.2114119  | -2.9504984 | 1.0392753  |
| H  | -0.0360531 | -1.5787644 | -0.1253007 |
| Li | 1.1323869  | 0.1266686  | 0.1149443  |
| C  | 3.0414189  | -0.4495484 | 2.3098653  |
| O  | 2.5953319  | 0.4879576  | 1.3129943  |
| C  | 3.6949639  | 1.3196586  | 0.8839883  |
| C  | 4.8966799  | 0.9007746  | 1.7311963  |
| C  | 4.5478679  | -0.5391394 | 2.1198333  |
| H  | 2.7785269  | -0.0641734 | 3.3017593  |
| H  | 2.5105699  | -1.3902944 | 2.1431423  |
| H  | 3.8539129  | 1.1354906  | -0.1848317 |
| H  | 3.4151049  | 2.3662456  | 1.0267273  |
| H  | 5.8368019  | 0.9829236  | 1.1820853  |
| H  | 4.9705049  | 1.5275496  | 2.6251273  |
| H  | 4.7910349  | -1.2316744 | 1.3069503  |
| H  | 5.0617489  | -0.8762604 | 3.0223333  |
| C  | 2.9507329  | -1.6975864 | -1.1608337 |
| O  | 1.9329389  | -0.7131284 | -1.4289547 |
| C  | 1.1262689  | -1.1272884 | -2.5524507 |
| C  | 1.3463659  | -2.6276254 | -2.6597287 |
| C  | 2.8188259  | -2.7543064 | -2.2569057 |
| H  | 3.9236279  | -1.1990944 | -1.1512077 |

|   |            |            |            |
|---|------------|------------|------------|
| H | 2.7596199  | -2.1203324 | -0.1664137 |
| H | 0.0950209  | -0.8368914 | -2.3399227 |
| H | 1.4747549  | -0.6002424 | -3.4479627 |
| H | 0.7013939  | -3.1605364 | -1.9519587 |
| H | 1.1427789  | -3.0085364 | -3.6626407 |
| H | 3.0856909  | -3.7518034 | -1.9015967 |
| H | 3.4668169  | -2.5096714 | -3.1041967 |
| C | -2.4953851 | -1.1580194 | -1.4672297 |
| H | -2.2283571 | -1.7897084 | -2.3187507 |
| H | -3.0950391 | -0.3069104 | -1.8108337 |

$E_{\text{gas}} = -1271.18631888$

$E_{\text{THF}} = -1271.25683877$

$E_{\text{CHCl}_3} = -1271.25633339$

$G_{\text{gas}} = -1270.639005$

$G_{\text{THF}} = -1270.709369$

$G_{\text{CHCl}_3} = -1270.709020$

Imaginary frequency = -540.2805

|   |            |            |            |
|---|------------|------------|------------|
| H | -3.8883275 | -1.5150332 | -1.2018323 |
| H | -4.3516835 | 0.0988248  | -1.7577323 |
| C | 2.4205085  | 1.7272728  | -0.5860693 |
| C | 2.5668965  | 2.7800128  | 0.4781807  |
| H | 2.5890865  | 2.0763788  | -1.6047253 |
| H | 2.8795085  | 3.7744028  | 0.1746427  |
| H | 2.9355095  | 2.4724578  | 1.4523377  |
| C | 1.1951785  | 2.3068478  | 0.0816617  |
| H | 0.5620665  | 2.9715388  | -0.4997133 |
| H | 0.6673725  | 1.6638258  | 0.7794397  |

$E_{\text{gas}} = -798.945536508$

$E_{\text{THF}} = -798.964116502$

$E_{\text{CHCl}_3} = -798.966060073$

$G_{\text{gas}} = -798.624222$

$G_{\text{THF}} = -798.642907$

$G_{\text{CHCl}_3} = -798.644745$

### 15a

|   |            |            |            |
|---|------------|------------|------------|
| C | 3.9502435  | 0.0128688  | 0.4301947  |
| C | 2.8299675  | 0.3060528  | -0.3486073 |
| C | 2.1085535  | -0.7479682 | -0.9372333 |
| C | 2.5268215  | -2.0595772 | -0.7088493 |
| C | 3.6372475  | -2.3418282 | 0.0794907  |
| C | 4.3562885  | -1.2989642 | 0.6516827  |
| H | 4.5150135  | 0.8323058  | 0.8665107  |
| H | 1.9670905  | -2.8767132 | -1.1587283 |
| H | 3.9391745  | -3.3725902 | 0.2417857  |
| H | 5.2312125  | -1.5026542 | 1.2621587  |
| C | 0.8812455  | -0.4876332 | -1.7746323 |
| H | 0.7504755  | -1.2947462 | -2.5081113 |
| H | 0.9866025  | 0.4286938  | -2.3669513 |
| B | -0.4582805 | -0.3833502 | -0.9491883 |
| O | -1.6694545 | -0.1152682 | -1.5343213 |
| O | -0.5517855 | -0.5751332 | 0.4040607  |
| C | -1.9523075 | -0.6415862 | 0.7371777  |
| C | -2.6238365 | 0.0981508  | -0.4736043 |
| C | -2.1665995 | 0.0211118  | 2.0909547  |
| H | -3.2335215 | 0.0594618  | 2.3368777  |
| H | -1.7667635 | 1.0374388  | 2.1072207  |
| H | -1.6561525 | -0.5554872 | 2.8678037  |
| C | -2.3142955 | -2.1260252 | 0.8152027  |
| H | -3.3532205 | -2.2721002 | 1.1269997  |
| H | -1.6594435 | -2.6099432 | 1.5451677  |
| H | -2.1671605 | -2.6201832 | -0.1502903 |
| C | -2.7324765 | 1.6107558  | -0.2722253 |
| H | -3.0199085 | 2.0734148  | -1.2206173 |
| H | -1.7746365 | 2.0404938  | 0.0363997  |
| H | -3.4861975 | 1.8632658  | 0.4800307  |
| C | -3.9704605 | -0.4679402 | -0.9033383 |
| H | -4.6995515 | -0.3908532 | -0.0892103 |

### 16

|   |            |            |            |
|---|------------|------------|------------|
| C | -0.9978714 | 0.8471089  | 1.9812664  |
| C | -0.7059334 | 0.5876289  | 0.5215564  |
| C | -0.7342864 | 1.8773309  | -0.3354136 |
| C | -1.2722374 | 3.0929099  | 0.2756884  |
| C | -1.5915964 | 3.1650239  | 1.5783374  |
| C | -1.4093264 | 2.0231569  | 2.4647124  |
| H | -0.8582624 | 0.0108119  | 2.6617484  |
| H | -1.4159584 | 3.9655379  | -0.3530956 |
| H | -1.9864024 | 4.0893229  | 1.9909754  |
| H | -1.6063404 | 2.1462359  | 3.5258704  |
| C | -0.3028674 | 1.8397589  | -1.6131416 |
| H | 0.0864006  | 0.8939489  | -1.9887546 |
| B | 0.7843956  | 0.0644519  | 0.3964944  |
| O | 1.2038366  | -0.8168651 | -0.5699886 |
| O | 1.8055376  | 0.4997209  | 1.1980434  |
| C | 3.0363906  | 0.1115689  | 0.5537224  |
| C | 2.5873026  | -1.1242591 | -0.2971636 |
| C | 4.0812496  | -0.1871491 | 1.6184834  |
| H | 5.0000266  | -0.5681801 | 1.1591264  |
| H | 3.7192656  | -0.9221811 | 2.3405034  |
| H | 4.3252196  | 0.7303189  | 2.1617804  |
| C | 3.4740666  | 1.3016889  | -0.3026506 |
| H | 4.4367736  | 1.1170599  | -0.7896116 |
| H | 3.5712676  | 2.1800709  | 0.3413434  |
| H | 2.7264426  | 1.5301279  | -1.0692266 |
| C | 2.6007296  | -2.4338651 | 0.4930264  |
| H | 2.0751236  | -3.2003121 | -0.0840046 |
| H | 2.0879006  | -2.3200541 | 1.4534234  |
| H | 3.6217156  | -2.7803271 | 0.6813624  |
| C | 3.3202186  | -1.2964851 | -1.6194766 |
| H | 4.3916416  | -1.4489441 | -1.4493836 |
| H | 3.1876586  | -0.4263111 | -2.2658836 |

|   |            |            |            |
|---|------------|------------|------------|
| H | 2.9296956  | -2.1729841 | -2.1447816 |
| C | -1.7196124 | -0.4565401 | -0.0586856 |
| C | -1.6743694 | -1.8151561 | 0.6577714  |
| C | -3.1585664 | 0.0760899  | -0.0858126 |
| H | -1.4101994 | -0.6335271 | -1.0985486 |
| C | -2.6217774 | -2.8222441 | -0.0008326 |
| H | -1.9725064 | -1.6923961 | 1.7079594  |
| H | -0.6513334 | -2.2095311 | 0.6544234  |
| C | -4.1232144 | -0.9284851 | -0.7229146 |
| H | -3.4786554 | 0.2930879  | 0.9428664  |
| H | -3.1930064 | 1.0239969  | -0.6333816 |
| C | -4.0573174 | -2.2923471 | -0.0312966 |
| H | -2.5796914 | -3.7809851 | 0.5296024  |
| H | -2.2842594 | -3.0142511 | -1.0291966 |
| H | -5.1463334 | -0.5351711 | -0.6928346 |
| H | -3.8651804 | -1.0525501 | -1.7844896 |
| H | -4.7182674 | -3.0081221 | -0.5344536 |
| H | -4.4251814 | -2.1912751 | 0.9998284  |
| C | -0.2843364 | 2.9516749  | -2.6202166 |
| H | 0.7404606  | 3.1376509  | -2.9665996 |
| H | -0.8694854 | 2.6776229  | -3.5071356 |
| H | -0.6789454 | 3.8965899  | -2.2409416 |

$E_{\text{gas}} = -956.191635785$

$E_{\text{THF}} = -956.210354904$

$G_{\text{gas}} = -955.757532$

$G_{\text{THF}} = -955.776240$

### 17a-syn

|   |            |            |            |
|---|------------|------------|------------|
| C | 0.3538699  | -0.8553074 | -0.7724123 |
| C | -0.8236631 | -0.7289034 | 0.1597677  |
| C | -0.4717361 | -1.2285304 | 1.5648167  |
| C | 0.8805729  | -1.7767414 | 1.7444227  |
| C | 1.5875439  | -2.3104684 | 0.6599457  |
| C | 1.3439909  | -1.7946284 | -0.6200843 |
| H | 0.2981109  | -0.2925214 | -1.6994073 |
| H | 1.1700129  | -2.0996964 | 2.7365517  |
| H | 2.4430569  | -2.9508714 | 0.8464627  |
| H | 2.0457609  | -1.9889124 | -1.4263493 |
| C | -1.3478911 | -1.1663154 | 2.5793627  |
| H | -2.3189871 | -0.7243544 | 2.3690487  |
| B | -1.2167651 | 0.8149076  | 0.1881237  |
| O | -1.8745761 | 1.4273056  | 1.2198207  |
| O | -1.0677481 | 1.6216306  | -0.9079853 |
| C | -1.4102611 | 2.9613356  | -0.4965313 |
| C | -2.3639441 | 2.6904996  | 0.7181567  |
| C | -2.0602181 | 3.6796596  | -1.6701303 |
| H | -2.4193761 | 4.6685846  | -1.3645453 |
| H | -2.9006201 | 3.1111536  | -2.0751453 |
| H | -1.3237721 | 3.8152586  | -2.4674023 |
| C | -0.1093341 | 3.6581936  | -0.0994023 |
| H | -0.2815951 | 4.7137526  | 0.1350967  |

|   |            |            |            |
|---|------------|------------|------------|
| H | 0.5970629  | 3.5862636  | -0.9302413 |
| H | 0.3525099  | 3.1685846  | 0.7620777  |
| C | -3.8184411 | 2.4591226  | 0.3041927  |
| H | -4.3770561 | 2.0853166  | 1.1672397  |
| H | -3.8876561 | 1.7124376  | -0.4938953 |
| H | -4.2913881 | 3.3833786  | -0.0417063 |
| C | -2.2899301 | 3.7247796  | 1.8312827  |
| H | -2.5711261 | 4.7139786  | 1.4535207  |
| H | -1.2857431 | 3.7830106  | 2.2551647  |
| H | -2.9837241 | 3.4554046  | 2.6333147  |
| C | 2.5793449  | 0.9137246  | -0.1557883 |
| C | 3.2716839  | -0.3746554 | 1.5731117  |
| O | 2.5800459  | 1.6188166  | -1.1322293 |
| O | 3.9249009  | -1.0050004 | 2.3638657  |
| C | -2.0475991 | -1.5424514 | -0.4214663 |
| C | -2.4756781 | -1.1082614 | -1.8328443 |
| C | -1.8374171 | -3.0629654 | -0.3959613 |
| H | -2.8859651 | -1.3184314 | 0.2554197  |
| C | -3.7499351 | -1.8366604 | -2.2705743 |
| H | -1.6724111 | -1.3436334 | -2.5452333 |
| H | -2.6214231 | -0.0247264 | -1.8826173 |
| C | -3.1035021 | -3.8063114 | -0.8330723 |
| H | -1.0110931 | -3.3261244 | -1.0702313 |
| H | -1.5436151 | -3.3849794 | 0.6084837  |
| C | -3.5700121 | -3.3554774 | -2.2191463 |
| H | -4.0313321 | -1.5201874 | -3.2816633 |
| H | -4.5768121 | -1.5460514 | -1.6065613 |
| H | -2.9230461 | -4.8875744 | -0.8247863 |
| H | -3.9023411 | -3.6148954 | -0.1023663 |
| H | -4.5041641 | -3.8606304 | -2.4908153 |
| H | -2.8197871 | -3.6529494 | -2.9653663 |
| C | -1.1658741 | -1.5992924 | 4.0016007  |
| H | -0.2028611 | -2.0715324 | 4.2050927  |
| H | -1.2583051 | -0.7327954 | 4.6672847  |
| H | -1.9535171 | -2.3058774 | 4.2896907  |
| N | 1.4742119  | 0.6873046  | 0.7195357  |
| N | 1.8664999  | -0.0320164 | 1.7278757  |
| N | 3.6771659  | 0.2337656  | 0.3962207  |
| C | 4.9766759  | 0.1531446  | -0.1719093 |
| C | 5.6797759  | -1.0488684 | -0.1047113 |
| C | 5.5340779  | 1.2673846  | -0.7967303 |
| C | 6.9504919  | -1.1302794 | -0.6619193 |
| H | 5.2411359  | -1.9050834 | 0.3934827  |
| C | 6.8009269  | 1.1674766  | -1.3614183 |
| H | 4.9734539  | 2.1920526  | -0.8533243 |
| C | 7.5137999  | -0.0259534 | -1.2945623 |
| H | 7.4984769  | -2.0656204 | -0.6030733 |
| H | 7.2332449  | 2.0340856  | -1.8519903 |
| H | 8.5038379  | -0.0957744 | -1.7344363 |

$E_{\text{gas}} = -1578.68715526$

$E_{\text{THF}} = -1578.71962664$

$G_{\text{gas}} = -1578.136954$

$G_{\text{THF}} = -1578.169426$

Imaginary frequency = -388.4938

**17b-syn**

|   |            |            |            |
|---|------------|------------|------------|
| C | -0.3473319 | -1.0570975 | -1.7451282 |
| C | -0.7233929 | -0.7203445 | -0.3047892 |
| C | -0.2422469 | -1.8155605 | 0.6569658  |
| C | 0.2207431  | -3.0547355 | 0.0401418  |
| C | -0.0222359 | -3.3867155 | -1.2671462 |
| C | -0.3410349 | -2.3714975 | -2.1882512 |
| H | -0.5422269 | -0.2811045 | -2.4768772 |
| H | 0.6419651  | -3.8164235 | 0.6882808  |
| H | 0.2033481  | -4.3884015 | -1.6194822 |
| H | -0.3603419 | -2.5783045 | -3.2544012 |
| C | -0.3010609 | -1.6642565 | 1.9937818  |
| H | -0.6588159 | -0.7124315 | 2.3759328  |
| B | -0.1239259 | 0.7052665  | 0.0638318  |
| O | -0.0722319 | 1.2171685  | 1.3329698  |
| O | 0.3078151  | 1.5992385  | -0.8804792 |
| C | 0.9272631  | 2.7003685  | -0.1857912 |
| C | 0.2565901  | 2.6173905  | 1.2293888  |
| C | 0.6494091  | 3.9816325  | -0.9572592 |
| H | 1.0482131  | 4.8493715  | -0.4205562 |
| H | -0.4203649 | 4.1292585  | -1.1191542 |
| H | 1.1351471  | 3.9297125  | -1.9357232 |
| C | 2.4292231  | 2.4124495  | -0.1593832 |
| H | 2.9864641  | 3.2300595  | 0.3085458  |
| H | 2.7782121  | 2.3010065  | -1.1902252 |
| H | 2.6431561  | 1.4833625  | 0.3797188  |
| C | -1.0614279 | 3.3874085  | 1.3225378  |
| H | -1.5569539 | 3.1292095  | 2.2628198  |
| H | -1.7356489 | 3.1222565  | 0.5020918  |
| H | -0.8967869 | 4.4691075  | 1.3022848  |
| C | 1.1675821  | 2.9898565  | 2.3904488  |
| H | 1.5141361  | 4.0243595  | 2.2920308  |
| H | 2.0363601  | 2.3299315  | 2.4392268  |
| H | 0.6201291  | 2.9010185  | 3.3334798  |
| C | 1.9732001  | -0.0842455 | -2.9649662 |
| C | 3.0349221  | -1.9280385 | 0.2761888  |
| O | 1.1763841  | 0.1617305  | -3.8345672 |
| O | 3.7473901  | -2.9105335 | 0.2368148  |
| C | -2.2911899 | -0.5655535 | -0.1870212 |
| C | -2.8752999 | 0.4874565  | -1.1444152 |
| C | -3.0770539 | -1.8759285 | -0.3282952 |
| H | -2.4584789 | -0.2041815 | 0.8394338  |
| C | -4.3624069 | 0.7249525  | -0.8695932 |
| H | -2.7603179 | 0.1421045  | -2.1803702 |
| H | -2.3231859 | 1.4323005  | -1.0758512 |
| C | -4.5692939 | -1.6550255 | -0.0587232 |
| H | -2.9456219 | -2.2759055 | -1.3425852 |
| H | -2.6820479 | -2.6263735 | 0.3639618  |
| C | -5.1564479 | -0.5792295 | -0.9751312 |
| H | -4.7570949 | 1.4694365  | -1.5709172 |

|   |            |            |            |
|---|------------|------------|------------|
| H | -4.4827589 | 1.1449275  | 0.1395198  |
| H | -5.1123219 | -2.5990785 | -0.1842152 |
| H | -4.7047589 | -1.3510445 | 0.9891068  |
| H | -6.2119799 | -0.4052695 | -0.7356002 |
| H | -5.1216539 | -0.9352945 | -2.0145772 |
| C | 0.0875891  | -2.6478705 | 3.0565278  |
| H | 0.8113041  | -2.1913775 | 3.7434618  |
| H | -0.7831889 | -2.9289585 | 3.6628218  |
| H | 0.5317621  | -3.5692645 | 2.6728378  |
| O | 2.9227771  | -1.1181785 | 1.3538678  |
| O | 3.2344431  | 0.3695225  | -3.1008962 |
| C | 2.2125831  | -1.4462865 | -0.7817862 |
| C | 1.6688161  | -0.8732685 | -1.7473912 |
| C | 4.3042591  | -0.0165725 | -2.2453022 |
| H | 4.1668471  | 0.3726585  | -1.2333372 |
| H | 4.4170561  | -1.1033825 | -2.2090372 |
| H | 5.1928021  | 0.4306915  | -2.6923782 |
| C | 3.6313691  | -1.5534345 | 2.5106048  |
| H | 3.4373121  | -0.7968405 | 3.2707398  |
| H | 3.2621031  | -2.5274525 | 2.8432328  |
| H | 4.7024571  | -1.6297555 | 2.3080068  |

$E_{\text{gas}} = -1489.23387813$

$E_{\text{THF}} = -1489.26112583$

$G_{\text{gas}} = -1488.693693$

$G_{\text{THF}} = -1488.720940$

Imaginary frequency = -358.1324

**17c-syn**

|   |            |            |            |
|---|------------|------------|------------|
| C | -1.4732112 | 0.4546176  | -1.2308726 |
| C | -0.5390622 | 0.4981376  | -0.0269406 |
| C | -1.3510482 | 0.6617556  | 1.2664044  |
| C | -2.7789802 | 0.9577796  | 1.0800604  |
| C | -3.2427202 | 1.5637546  | -0.0815076 |
| C | -2.5711222 | 1.3109156  | -1.2760786 |
| H | -1.0307512 | 0.1326326  | -2.1694096 |
| H | -3.4076572 | 1.0040146  | 1.9627104  |
| H | -4.2228892 | 2.0297796  | -0.0913276 |
| H | -3.0290672 | 1.5655046  | -2.2271396 |
| C | -0.7818672 | 0.5991536  | 2.4828524  |
| H | 0.2808918  | 0.3766706  | 2.5289784  |
| B | 0.4206308  | -0.7689334 | 0.0042204  |
| O | 1.2559578  | -1.0692234 | 1.0458374  |
| O | 0.5758648  | -1.6259344 | -1.0556276 |
| C | 1.4378438  | -2.7049054 | -0.6270696 |
| C | 2.1998518  | -2.0585564 | 0.5819294  |
| C | 2.3203588  | -3.1166934 | -1.7957926 |
| H | 3.0429078  | -3.8774354 | -1.4814926 |
| H | 2.8645168  | -2.2636554 | -2.2065256 |
| H | 1.7023378  | -3.5402364 | -2.5924516 |
| C | 0.5239468  | -3.8603664 | -0.2173586 |
| H | 1.0989628  | -4.7423074 | 0.0803654  |



H -0.1075572 -4.1338274 -1.0679036  
H -0.1300372 -3.5744404 0.6131704  
C 3.4634278 -1.3008554 0.1719594  
H 3.8231628 -0.7254514 1.0295694  
H 3.2628668 -0.5996004 -0.6438156  
H 4.2561138 -1.9856884 -0.1437266  
C 2.5105618 -3.0136244 1.7254034  
H 3.1621598 -3.8242004 1.3818544  
H 1.6010798 -3.4478404 2.1452224  
H 3.0290068 -2.4755284 2.5243174  
C -3.6124182 -1.2811944 -1.8102816  
C -4.6047512 -1.0374514 0.2118984  
O -3.5570682 -1.4241874 -2.9981566  
O -5.5238332 -0.9382674 0.9743964  
C 0.4645898 1.7183036 -0.1819206  
C 1.2591968 1.6806516 -1.4984856  
C -0.1543522 3.1103866 -0.0043096  
H 1.1839248 1.5865776 0.6404804  
C 2.3587508 2.7458006 -1.5116576  
H 0.5754768 1.8667456 -2.3378956  
H 1.6924368 0.6882166 -1.6728286  
C 0.9331058 4.1908266 -0.0112246  
H -0.8660102 3.3056946 -0.8162736  
H -0.7186872 3.1554326 0.9325844  
C 1.7723628 4.1422856 -1.2903506  
H 2.9052818 2.7076016 -2.4610886  
H 3.0860088 2.5241956 -0.7173416  
H 0.4739218 5.1794006 0.1041434  
H 1.5906338 4.0458576 0.8578814  
H 2.5720228 4.8908186 -1.2514496  
H 1.1360268 4.4024486 -2.1479876  
C -1.4286372 0.8062396 3.8205834  
H -0.9520172 1.6418196 4.3482024  
H -2.4992252 1.0155206 3.7708114  
H -1.2911862 -0.0809654 4.4507984  
O -4.7929042 -0.9583804 -1.1665236  
C -2.5453152 -1.3744804 -0.7827906  
H -1.6523172 -1.9422874 -1.0018816  
C -3.1666922 -1.2349774 0.4513754  
H -2.8048042 -1.5780464 1.4094754

$E_{\text{gas}} = -1335.45975502$

$E_{\text{THF}} = -1335.48975266$

$G_{\text{gas}} = -1334.972635$

$G_{\text{THF}} = -1335.002633$

Imaginary frequency = -517.0099

### 17d-syn

C 1.0955874 -0.3671143 -1.6338687  
C 0.3730504 -0.6445173 -0.3118507  
C 1.4201534 -0.9842333 0.7529453  
C 2.6694504 -1.5442223 0.2168293  
C 2.8005004 -1.9485393 -1.1065917

C 2.0263824 -1.3093293 -2.0703627  
H 0.5381524 0.1964767 -2.3776697  
H 3.3987814 -1.9150853 0.9300853  
H 3.6501724 -2.5537763 -1.4024967  
H 2.2915634 -1.3827263 -3.1206467  
C 1.2106344 -0.8483683 2.0746883  
H 0.2829604 -0.3857513 2.3926463  
B -0.6950866 0.4830177 0.0573163  
O -1.2340856 0.6507897 1.3051293  
O -1.3656256 1.2151327 -0.8990777  
C -2.5678526 1.7359907 -0.2879417  
C -2.2273506 1.6908977 1.2442413  
C -3.7116846 0.7991497 -0.6848847  
H -4.6730266 1.1628807 -0.3090797  
H -3.5530636 -0.2138433 -0.3043027  
H -3.7642376 0.7444537 -1.7763517  
C -2.8571666 3.1304897 -0.8244837  
H -3.7743536 3.5251397 -0.3737827  
H -3.0046476 3.0856737 -1.9081777  
H -2.0461316 3.8269377 -0.6095477  
C -3.3930226 1.2935597 2.1418323  
H -3.0570506 1.2649617 3.1824713  
H -3.7864526 0.3069447 1.8875723  
H -4.2037016 2.0265247 2.0666053  
C -1.5792466 2.9714627 1.7697093  
H -2.3023666 3.7925847 1.8113733  
H -0.7248646 3.2613847 1.1541603  
H -1.2114416 2.7853807 2.7830123  
C 1.6841064 2.2179687 -0.9248207  
C 4.7848234 0.1718667 -0.5426167  
O 1.1881674 2.4798917 0.1537023  
O 5.1045564 -0.0732113 -1.6856177  
C -0.4857486 -1.9834453 -0.5547737  
C -1.3612766 -2.3824073 0.6421143  
C -1.3318006 -1.9650263 -1.8391457  
H 0.2623804 -2.7780453 -0.6804447  
C -2.0364436 -3.7364163 0.4101373  
H -2.1379176 -1.6267953 0.8138043  
H -0.7579296 -2.4150863 1.5540823  
C -2.0353356 -3.3075803 -2.0658187  
H -2.0778596 -1.1639453 -1.7869697  
H -0.7018346 -1.7461683 -2.7066907  
C -2.8851736 -3.7158033 -0.8620197  
H -2.6528246 -3.9974343 1.2786493  
H -1.2685116 -4.5178443 0.3212723  
H -2.6521536 -3.2531903 -2.9707497  
H -1.2769416 -4.0822633 -2.2479977  
H -3.3492706 -4.6941093 -1.0336107  
H -3.7045826 -2.9928573 -0.7360197  
C 2.1295344 -1.2408893 3.1950533  
H 2.9378994 -1.9131303 2.8953663  
H 2.5837344 -0.3514323 3.6535063  
H 1.5656184 -1.7433903 3.9893603

|   |            |            |            |
|---|------------|------------|------------|
| C | 2.6268514  | 1.1169517  | -1.1965857 |
| H | 3.0477664  | 1.1175797  | -2.1944187 |
| C | 3.4431854  | 0.6508217  | -0.1676597 |
| H | 3.2125074  | 0.9487787  | 0.8459423  |
| C | 5.4355444  | 0.3245477  | 1.7760483  |
| H | 6.3402914  | 0.0770177  | 2.3328603  |
| H | 4.5936414  | -0.2362383 | 2.1956553  |
| H | 5.2405294  | 1.3983567  | 1.8709993  |
| C | 0.5112754  | 3.9762127  | -1.9744327 |
| H | 0.7612314  | 4.6588077  | -2.7869837 |
| H | 0.5744474  | 4.4856577  | -1.0105757 |
| H | -0.4919356 | 3.5712627  | -2.1152697 |
| O | 1.4528624  | 2.9119117  | -2.0486877 |
| O | 5.7016544  | -0.0432533 | 0.4338523  |

$E_{\text{gas}} = -1490.50086817$

$E_{\text{THF}} = -1490.52692290$

$G_{\text{gas}} = -1489.931204$

$G_{\text{THF}} = -1489.957259$

Imaginary frequency = -472.6604

### 17e-syn

|   |            |            |            |
|---|------------|------------|------------|
| C | 0.7598965  | -0.7825430 | -1.2359209 |
| C | -0.2326345 | -0.7355700 | -0.0713999 |
| C | 0.4175355  | -1.2932860 | 1.2050001  |
| C | 1.6305745  | -2.0841380 | 0.9970761  |
| C | 2.0102465  | -2.5637850 | -0.2343929 |
| C | 1.5646665  | -1.9090960 | -1.3889339 |
| H | 0.4531055  | -0.2643030 | -2.1399319 |
| H | 2.1294715  | -2.4841380 | 1.8740181  |
| H | 2.8024775  | -3.3011000 | -0.3035519 |
| H | 2.0196135  | -2.1213070 | -2.3485899 |
| C | -0.1421525 | -1.1447490 | 2.4215601  |
| H | -1.0467595 | -0.5479950 | 2.4931211  |
| B | -0.8381325 | 0.7231030  | 0.1128491  |
| O | -1.6745435 | 1.0849150  | 1.1370841  |
| O | -0.6642705 | 1.7415730  | -0.7927459 |
| C | -1.2269535 | 2.9413660  | -0.2193869 |
| C | -2.2592445 | 2.3619860  | 0.8073391  |
| C | -1.8321575 | 3.7805850  | -1.3343379 |
| H | -2.3335845 | 4.6626310  | -0.9216659 |
| H | -2.5538765 | 3.2074950  | -1.9199569 |
| H | -1.0423775 | 4.1211250  | -2.0099819 |
| C | -0.0726265 | 3.6928660  | 0.4460731  |
| H | -0.4049665 | 4.6446530  | 0.8713871  |
| H | 0.6969905  | 3.8996240  | -0.3033269 |
| H | 0.3820065  | 3.0948050  | 1.2428881  |
| C | -3.6315225 | 2.0779410  | 0.1950951  |
| H | -4.2215945 | 1.4924570  | 0.9058031  |
| H | -3.5458975 | 1.4981830  | -0.7289449 |
| H | -4.1705645 | 3.0047690  | -0.0239399 |
| C | -2.4145675 | 3.1715160  | 2.0868481  |
| H | -2.7837175 | 4.1782630  | 1.8633001  |

|   |            |            |            |
|---|------------|------------|------------|
| H | -1.4686165 | 3.2561030  | 2.6255311  |
| H | -3.1378655 | 2.6821870  | 2.7455631  |
| C | 3.0540635  | 0.6811180  | -1.9378619 |
| C | 4.0374625  | -0.5120520 | 0.5502561  |
| O | 2.8602615  | 0.1511340  | -3.0057009 |
| O | 4.5640035  | -0.9449140 | -0.4577719 |
| C | -1.5135885 | -1.6066990 | -0.4164419 |
| C | -2.1871745 | -1.1880030 | -1.7350869 |
| C | -1.3157215 | -3.1282370 | -0.4154389 |
| H | -2.2180795 | -1.3856080 | 0.3998881  |
| C | -3.5377575 | -1.8858000 | -1.9127049 |
| H | -1.5332705 | -1.4586060 | -2.5749419 |
| H | -2.3149005 | -0.0995240 | -1.7882469 |
| C | -2.6583545 | -3.8471130 | -0.5891339 |
| H | -0.6393095 | -3.4153220 | -1.2300829 |
| H | -0.8433895 | -3.4477080 | 0.5186111  |
| C | -3.3780925 | -3.4074610 | -1.8664009 |
| H | -3.9975595 | -1.5795120 | -2.8596119 |
| H | -4.2185105 | -1.5650780 | -1.1109499 |
| H | -2.5001825 | -4.9318520 | -0.5980569 |
| H | -3.2973675 | -3.6288330 | 0.2786291  |
| H | -4.3560125 | -3.8969110 | -1.9430839 |
| H | -2.7923485 | -3.7308780 | -2.7384509 |
| C | 0.3334045  | -1.7096630 | 3.7288501  |
| H | 0.6719065  | -0.9085660 | 4.4000161  |
| H | -0.4907325 | -2.2172440 | 4.2445641  |
| H | 1.1494795  | -2.4299250 | 3.6329261  |
| C | 2.2043835  | 0.5646310  | -0.6883479 |
| H | 1.4658535  | 1.3607480  | -0.6562169 |
| C | 2.7732495  | 0.2130090  | 0.5328161  |
| H | 2.3149285  | 0.5681820  | 1.4449051  |
| C | 4.1084585  | -0.2494020 | 2.9412631  |
| H | 4.7953195  | -0.5590880 | 3.7302481  |
| H | 3.1167885  | -0.6717610 | 3.1439661  |
| H | 4.0429545  | 0.8446760  | 2.9338481  |
| C | 4.9377525  | 1.7409460  | -2.8107359 |
| H | 5.6483525  | 2.5011100  | -2.4865669 |
| H | 4.4290425  | 2.0548140  | -3.7257919 |
| H | 5.4481265  | 0.7910900  | -2.9869069 |
| O | 4.0121745  | 1.5977310  | -1.7364309 |
| O | 4.6564305  | -0.7495660 | 1.7366511  |

$E_{\text{gas}} = -1490.49565057$

$E_{\text{THF}} = -1490.52465929$

$G_{\text{gas}} = -1489.929936$

$G_{\text{THF}} = -1489.958934$

Imaginary frequency = -432.8188

### 17f-syn

|   |            |           |            |
|---|------------|-----------|------------|
| C | -0.5262238 | 0.8941260 | -1.2605054 |
| C | 0.3182852  | 0.7044020 | -0.0233414 |
| C | -0.4809358 | 1.0192010 | 1.2475246  |
| C | -1.8934878 | 1.3988560 | 1.0453666  |

|   |            |            |            |
|---|------------|------------|------------|
| C | -2.2733958 | 2.0575280  | -0.1334224 |
| C | -1.6016438 | 1.7414350  | -1.3209554 |
| H | -0.1249338 | 0.4786910  | -2.1797724 |
| H | -2.4785428 | 1.5980220  | 1.9356856  |
| H | -3.2101278 | 2.6039540  | -0.1637844 |
| H | -2.0436618 | 2.0032210  | -2.2782134 |
| C | 0.0644902  | 0.9297540  | 2.4688156  |
| H | 1.1011902  | 0.6065900  | 2.5301536  |
| B | 0.7564902  | -0.8247720 | 0.0014376  |
| O | 1.1546532  | -1.4932420 | 1.1308076  |
| O | 0.9563972  | -1.5565630 | -1.1440154 |
| C | 1.2587732  | -2.9050120 | -0.7384334 |
| C | 1.8320272  | -2.6909170 | 0.7045896  |
| C | 2.2433572  | -3.5055240 | -1.7321174 |
| H | 2.5660192  | -4.4994190 | -1.4023494 |
| H | 3.1257322  | -2.8732910 | -1.8543594 |
| H | 1.7622262  | -3.6105050 | -2.7089904 |
| C | -0.0557378 | -3.6866920 | -0.7541084 |
| H | 0.1050032  | -4.7443150 | -0.5211404 |
| H | -0.4950568 | -3.6122550 | -1.7528424 |
| H | -0.7740558 | -3.2656770 | -0.0456174 |
| C | 3.3297462  | -2.3765620 | 0.7191696  |
| H | 3.6094852  | -2.0417860 | 1.7223386  |
| H | 3.5729552  | -1.5742290 | 0.0149206  |
| H | 3.9302032  | -3.2561990 | 0.4663556  |
| C | 1.5216532  | -3.8103900 | 1.6877766  |
| H | 1.9501022  | -4.7569240 | 1.3398046  |
| H | 0.4453252  | -3.9379280 | 1.8180456  |
| H | 1.9577542  | -3.5771170 | 2.6637386  |
| C | 1.6086892  | 1.6031110  | -0.1101694 |
| C | 2.4904812  | 1.3085650  | -1.3348334 |
| C | 1.3068152  | 3.1064730  | -0.0451734 |
| H | 2.2038922  | 1.3508340  | 0.7802056  |
| C | 3.7877542  | 2.1206420  | -1.2908724 |
| H | 1.9417582  | 1.5704120  | -2.2504324 |
| H | 2.7131622  | 0.2388450  | -1.4084864 |
| C | 2.5949042  | 3.9340200  | -0.0048084 |
| H | 0.7159992  | 3.3936630  | -0.9257214 |
| H | 0.6917332  | 3.3254360  | 0.8338896  |
| C | 3.5022422  | 3.6213500  | -1.1973974 |
| H | 4.3954372  | 1.9024760  | -2.1770674 |
| H | 4.3793552  | 1.8093890  | -0.4176084 |
| H | 2.3532592  | 5.0032790  | 0.0189456  |
| H | 3.1351692  | 3.7133700  | 0.9271306  |
| H | 4.4402892  | 4.1841230  | -1.1233814 |
| H | 3.0067602  | 3.9499410  | -2.1220934 |
| C | -0.5798018 | 1.1749960  | 3.8006316  |
| H | 0.0443692  | 1.8369030  | 4.4126276  |
| H | -1.5732508 | 1.6249510  | 3.7363626  |
| H | -0.6764968 | 0.2308760  | 4.3512496  |
| C | -3.9165818 | -0.1919320 | -0.0329514 |
| C | -4.1954618 | -0.4887620 | -1.3634654 |
| C | -4.9399508 | 0.1537560  | 0.8480526  |

|                                   |            |            |            |
|-----------------------------------|------------|------------|------------|
| C                                 | -5.5071288 | -0.4089410 | -1.8196784 |
| H                                 | -3.3771048 | -0.7799520 | -2.0121214 |
| C                                 | -6.2473408 | 0.2318950  | 0.3851896  |
| H                                 | -4.7023178 | 0.3535930  | 1.8892246  |
| C                                 | -6.5338128 | -0.0447310 | -0.9515004 |
| H                                 | -5.7292098 | -0.6327800 | -2.8592004 |
| H                                 | -7.0464408 | 0.5027020  | 1.0689686  |
| H                                 | -7.5564248 | 0.0148920  | -1.3119684 |
| N                                 | -2.5753328 | -0.3150280 | 0.5143756  |
| O                                 | -1.7594788 | -0.8348270 | -0.2904854 |
| $E_{\text{gas}} = -1317.69125077$ |            |            |            |
| $E_{\text{THF}} = -1317.71504524$ |            |            |            |
| $G_{\text{gas}} = -1317.1625837$  |            |            |            |
| $G_{\text{THF}} = -1317.1863782$  |            |            |            |
| Imaginary frequency = -373.2002   |            |            |            |

|                                                   |            |            |            |
|---------------------------------------------------|------------|------------|------------|
| <b>Li<sub>(THF)<sub>2</sub></sub><sup>+</sup></b> |            |            |            |
| Li                                                | -0.1867269 | -0.0354896 | -0.0480990 |
| C                                                 | -0.2444679 | -2.4716256 | -1.7150400 |
| O                                                 | 0.4088741  | -1.6747596 | -0.6899330 |
| C                                                 | 1.6000471  | -2.3545666 | -0.2103620 |
| C                                                 | 1.4865691  | -3.7763136 | -0.7404700 |
| C                                                 | 0.7538891  | -3.5656196 | -2.0685880 |
| H                                                 | -1.1657009 | -2.8816406 | -1.2885080 |
| H                                                 | -0.4906999 | -1.8121346 | -2.5508630 |
| H                                                 | 2.4743561  | -1.8350426 | -0.6162190 |
| H                                                 | 1.6098431  | -2.2885666 | 0.8804180  |
| H                                                 | 2.4639201  | -4.2472716 | -0.8614560 |
| H                                                 | 0.8891261  | -4.3928376 | -0.0615910 |
| H                                                 | 1.4461091  | -3.2192216 | -2.8422430 |
| H                                                 | 0.2572081  | -4.4676396 | -2.4309700 |
| C                                                 | -0.1334779 | 2.8938824  | 0.0363980  |
| O                                                 | -0.6038709 | 1.6485524  | 0.6179920  |
| C                                                 | -1.3938539 | 1.9193424  | 1.8083060  |
| C                                                 | -1.6214899 | 3.4252774  | 1.8046930  |
| C                                                 | -0.3557619 | 3.9427064  | 1.1151980  |
| H                                                 | 0.9144921  | 2.7610524  | -0.2438060 |
| H                                                 | -0.7283099 | 3.0986424  | -0.8598070 |
| H                                                 | -2.3149589 | 1.3348684  | 1.7447560  |
| H                                                 | -0.8137469 | 1.5955194  | 2.6785870  |
| H                                                 | -2.5110969 | 3.6786884  | 1.2200350  |
| H                                                 | -1.7508079 | 3.8205054  | 2.8139230  |
| H                                                 | -0.4760449 | 4.9425984  | 0.6940440  |
| H                                                 | 0.4865801  | 3.9610934  | 1.8136040  |
| $E_{\text{gas}} = -472.321628425$                 |            |            |            |
| $E_{\text{THF}} = -472.395718419$                 |            |            |            |
| $E_{\text{CHCl}_3} = -472.392397681$              |            |            |            |
| $G_{\text{gas}} = -472.123107$                    |            |            |            |
| $G_{\text{THF}} = -472.197197$                    |            |            |            |
| $G_{\text{CHCl}_3} = -472.193877$                 |            |            |            |

**LiB(CH<sub>3</sub>)<sub>4</sub>**

|    |            |            |            |
|----|------------|------------|------------|
| Li | 1.9354537  | 0.0601456  | -0.0484818 |
| C  | -1.6903893 | -0.0598354 | 0.0438722  |
| H  | -2.0611203 | -0.5390174 | 0.9608622  |
| H  | -2.1398263 | 0.9422326  | 0.0029392  |
| H  | -2.1023373 | -0.6287234 | -0.8013938 |
| C  | 0.5012057  | -1.5835714 | 0.0671962  |
| H  | 0.1279217  | -2.0589384 | 0.9825262  |
| H  | 0.0945357  | -2.1434784 | -0.7837498 |
| H  | 1.5887187  | -1.8495114 | 0.0600172  |
| C  | 0.3834167  | 0.7462306  | -1.4351688 |
| H  | -0.0053483 | 0.1649766  | -2.2803888 |
| H  | -0.0792673 | 1.7397716  | -1.4782218 |
| H  | 1.4486687  | 0.9431136  | -1.7165748 |
| C  | 0.4501737  | 0.8862416  | 1.3335742  |
| H  | 1.5279487  | 1.0990046  | 1.5482812  |
| H  | -0.0043033 | 1.8836246  | 1.2927742  |
| H  | 0.0945917  | 0.3989526  | 2.2497922  |
| B  | -0.0700423 | -0.0012174 | 0.0021452  |

$E_{\text{gas}} = -192.083850025$

$E_{\text{THF}} = -192.099165600$

$E_{\text{CHCl}_3} = -192.098555615$

$G_{\text{gas}} = -191.959744$

$G_{\text{THF}} = -191.975059$

$G_{\text{CHCl}_3} = -191.974496$

**Li<sup>+</sup>**

|    |           |           |           |
|----|-----------|-----------|-----------|
| Li | 0.0000000 | 0.0000000 | 0.0000000 |
|----|-----------|-----------|-----------|

$E_{\text{gas}} = -7.29270972417$

$E_{\text{THF}} = -7.41714868764$

$E_{\text{CHCl}_3} = -7.40627609425$

$G_{\text{gas}} = -7.305458$

$G_{\text{THF}} = -7.429897$

$G_{\text{CHCl}_3} = -7.419024$
